# Supplementary material for: ATAC-STARR-seq reveals transcription factor–bound activators and silencers within chromatin-accessible regions of the human genome
Source: PubMed Central journal article supplement — Genome Res. 2022 Aug;32(8):1529–41. doi: 10.1101/gr.276766.122 (PMC9435738; doi:10.1101/gr.276766.122), 2022-08
Supplement: supp_gr.276766.122_Supplemental_Materials.pdf [file supp_gr.276766.122_Supplemental_Materials.pdf]

1 **Supplemental Materials for:**

2 **ATAC-STARR-seq reveals transcription factor-bound activators and silencers across the**  
3 **chromatin accessible human genome**

4 Tyler J. Hansen<sup>1</sup> and Emily Hodges<sup>1,2,\*</sup>

5 <sup>1</sup> Department of Biochemistry, Vanderbilt University School of Medicine, Nashville, TN, 37232,  
6 USA

7 <sup>2</sup> Vanderbilt Genetics Institute, Vanderbilt University School of Medicine, Nashville, TN, 37232,  
8 USA

9 \* Correspondence: Tel: +1 615 875 9991; Email: emily.hodges@vanderbilt.edu

10 **Table of Contents:**

11 **Supplemental Text**

12 ATAC-STARR-seq Plasmid library complexity.....4

13 Optimizing ATAC-STARR-seq assay timeframe.....4

14 Investigating the influence of replicates on region calls.....5

15 Duplicate removal hinders region calling sensitivity.....6

16 Guidelines for ATAC-STAR-seq quality control.....6

17 **Supplemental Methods**

18 Determination of Harvest Time with Quantitative PCR.....9

|    |                                                                                       |    |
|----|---------------------------------------------------------------------------------------|----|
| 19 | Plasmid Library Complexity Estimation.....                                            | 10 |
| 20 | Transfection efficiency Estimation.....                                               | 10 |
| 21 | Read Processing.....                                                                  | 11 |
| 22 | Accessibility Analysis.....                                                           | 12 |
| 23 | Active and Silent Region Calling.....                                                 | 12 |
| 24 | Replicate Count Effects.....                                                          | 14 |
| 25 | Short vs. Long DNA Fragment Analysis.....                                             | 15 |
| 26 | Orientation Analysis.....                                                             | 15 |
| 27 | Active and Silent Peak Characterization.....                                          | 16 |
| 28 | TF Footprinting.....                                                                  | 18 |
| 29 | Integration of Regulatory Activity, Chromatin Accessibility, and TF Footprinting..... | 18 |
| 30 | <b>Supplemental Figure Legends.....</b>                                               | 19 |
| 31 | <b>Supplemental References.....</b>                                                   | 22 |
| 32 | <b>Supplemental Tables</b>                                                            |    |
| 33 | ST1. Comparison of Experimental Differences and Result Metrics Between Accessible     |    |
| 34 | Chromatin Coupled to STARR-seq techniques.....                                        | 26 |
| 35 | ST2. ATAC-STARR-seq Sequencing Summary Statistics.....                                | 27 |

|    |                                                                                  |
|----|----------------------------------------------------------------------------------|
| 36 | ST3. Genrich peak counts for varying FDR thresholds.....27                       |
| 37 | <b>Supplemental Figures</b>                                                      |
| 38 | S1. ATAC-STARR Optimization.....28                                               |
| 39 | S2. Characterization of ATAC-STARR sequencing Libraries.....29                   |
| 40 | S3. Correlation between ATAC-STARR-seq replicates.....30                         |
| 41 | S4. Comparison between the sliding window and the fragment group active region   |
| 42 | calling methods.....31                                                           |
| 43 | S5. Analysis of replicate count on region calling sensitivity.....32             |
| 44 | S6. Comparison between keeping duplicates and removing duplicates to call active |
| 45 | regions.....33                                                                   |
| 46 | S7. Effect of read length on regulatory region calls.....34                      |
| 47 | S8. Assessment of potential orientation bias in ATAC-STARR-seq data.....35       |
| 48 | S9. Additional Characterization of ATAC-STARR-seq Regulatory Regions.....36      |

## 49 **SUPPLEMENTAL TEXT**

### 50 **ATAC-STARR-seq plasmid library complexity**

51 A successful ATAC-STARR-seq experiment is predicated on maintaining complexity at all  
52 stages of the protocol. We estimated the initial complexity of our ATAC-STARR-seq plasmid  
53 library by sequencing the library at low depth and estimating the number of unique reads with  
54 the Preseq software package (Daley and Smith 2013) (Supplemental Figure S1A). The  
55 GM12878 ATAC-STARR-seq plasmid library contains a maximum complexity of about 50  
56 million unique accessible DNA fragments, providing ample coverage of accessible loci.

### 57 **Optimizing ATAC-STARR-seq assay timeframe**

58 The introduction of plasmid DNA into cells produces an interferon-stimulated gene response  
59 that can confound the isolation of biologically relevant regulatory activity (Muerdter et al. 2018).  
60 To minimize this interference in our data, we determined the optimal incubation time between  
61 electroporation and harvest. Two factors play an important role in determining when to harvest  
62 RNA: global reporter RNA expression levels and the timing of interferon stimulated gene  
63 response to STARR-seq reporter plasmid DNA. To investigate both factors, we electroporated  
64 ATAC-STARR-seq plasmid DNA, isolated poly-adenylated RNA at several time points after  
65 transfection, quantified RNA expression with qPCR, and compared to an untransfected sample  
66 (Supplemental Figure S1A). An increase in reporter RNA expression is observed at 3 hours (the  
67 earliest timepoint) and remains stable at later time points. We measured expression of *IFNB1*,  
68 *IFIT2*, and *ISG15* to characterize the interferon stimulated gene response in our system. RNA  
69 expression for all three genes increases initially but returns to baseline by 24 hours. Given the  
70 persistent level of reporter RNAs and the attenuated interferon stimulated gene response in our  
71 system, we decided to harvest 24 hours after electroporation. Together, this allows us to

72 capture reporter RNAs that reflect steady-state regulatory properties of GM12878 accessible  
73 regions without sacrificing reporter RNA recovery.

#### 74 **Investigating the influence of replicates on region calls**

75 We note that the Wang *et al.* 2018 study reported twice the number of active regions reported  
76 herein. This discrepancy may be explained in part by using the super core promoter in their  
77 assay, but another major difference between the two studies is replicate number (five replicates  
78 versus three replicates). To determine if the difference in active region count is driven by  
79 replicate number, we downloaded and analyzed raw sequencing data from Wang *et al.* 2018  
80 using our pipeline and analysis methods. We then assigned reads to the bins we analyzed and  
81 called active regions using either three or five replicates (Supplemental Figure S5A). With five  
82 replicates, we also captured ~66,000 active regions; however, we identified ~39,000 regions  
83 with only three replicates. This is much closer to the number we report (~30,000) and suspect  
84 the extra 9,000 regions may be the result of experimental differences, such as the promoter  
85 employed. Altogether the number of called active regions increases with more replicates.

86 To further investigate the effect of replicate number on region calling sensitivity in our data, we  
87 merged and split our three ATAC-STARR-seq replicates into five randomly sampled “pseudo-  
88 replicates”. We then called active regions using two, three, four, or five pseudo-replicates  
89 (Supplemental Figure S5B). We find the largest increase in region count going from two to three  
90 replicates. Thus, the three replicate condition seems to yield the best value, while additional  
91 replicates may be needed to detect more weakly active regulatory regions. However, it is also  
92 very important to note that studies investigating the relationship between replicate number,  
93 sensitivity, and accuracy for RNA-seq data have demonstrated that performing more replicates  
94 yields more differentially expressed genes, but this is concomitant with an increase in false  
95 positive rate (Schurch *et al.* 2016; Lamarre *et al.* 2018). Therefore, the additional regions that

96 are called with increasing replicate counts may represent a disproportionate number of false  
97 positives and may affect the outcomes of certain accuracy-sensitive applications like  
98 computational modelling.

### 99 **Duplicate removal hinders region calling sensitivity**

100 A question that often arises when determining biological signals from sequence read count data  
101 is whether to collapse read duplicates, as duplicates can arise both technically (PCR duplicates)  
102 and biologically (active regions generate multiple transcripts of themselves). To understand their  
103 contribution to data interpretation, we analysed our data with and without duplicates and  
104 compared the output. Removal of duplicates produces modest improvements to correlation  
105 coefficients between replicates, although both conditions had correlations indicative of  
106 satisfactory reproducibility (Supplemental Figures S3, 6A-B). However, excluding duplicates  
107 produced many fewer active regions called than including duplicates (~21,000 fewer regions)  
108 (Supplemental Figure S6C). Together, this indicates that removing duplicates modestly  
109 improves reproducibility but significantly sacrifices sensitivity. Furthermore, most of the regions  
110 called without duplicates are also called when duplicates are included, indicating that, for the  
111 most part, duplicate removal affects sensitivity and not accuracy (Supplemental Figure S6D).  
112 Because the with-duplicate analysis yielded many more additional regions and is reproducible  
113 between replicates, we included duplicates in our activity analysis moving forward. Importantly,  
114 because our approach filters by significance, reproducibility is required when calling active and  
115 silent regions. Therefore, identified active and silent regions are of high confidence when  
116 including duplicates.

### 117 **Guidelines for ATAC-STARR-seq quality control**

118 *Generate highly complex ATAC-STARR-seq plasmid libraries*

119 Library complexity is the most important consideration when generating an ATAC-STARR-seq  
120 plasmid library. Library complexity is defined by the number of unique DNA fragments analyzed  
121 in the library, i.e., the number of unique plasmid inserts, and the more complex a plasmid  
122 library, the more DNA sequences that are tested. Greater library complexity translates to greater  
123 coverage of the genome. While we have not experimented directly with different library  
124 complexities, less complex libraries would likely result in a reduction in sensitivity and fewer  
125 regions being called active and silent. To estimate library complexity, we suggest performing  
126 low-depth sequencing of the plasmid library prior to conducting the reporter assay portion of  
127 ATAC-STARR (see methods). In this report we find our library complexity is roughly 50 million  
128 unique sequences. We made critical choices in procedure and reagents used to ensure this  
129 high library complexity; therefore, we strongly discourage replacement of key procedures with  
130 faster, cheaper, or simpler alternatives. For the human genome, we recommend library  
131 complexities of at least 20 million.

### 132 *Perform minimal PCR cycles to keep PCR duplication rates low*

133 As mentioned previously, duplicates should not be collapsed when calling active and silent  
134 regions, because they can arise both technically (PCR duplicates) and biologically (active  
135 regions generate multiple transcripts of themselves). Due to this issue, it is important to  
136 minimize PCR duplicates when preparing sequencing libraries. To achieve this, we try to obtain  
137 just enough sequence-able material using the fewest number of PCR cycles. We recommend a  
138 duplication rate < 90% for Reporter RNA samples and < 50% for plasmid DNA samples.

### 139 *Reads should pass general quality filters*

140 The sequenced Reporter RNA and plasmid DNA libraries should be analyzed for quality using  
141 FastQC. Both should pass all FastQC quality filters except *per base sequence content* (Tn5 has

142 a bias) and *sequence duplication levels* (inherent quality of ATAC-STARR-seq). Mapping rate  
143 should be high (>80%) for most cell lines. For GM12878 cells, at least in our hands, ~20% of  
144 reads map to the Epstein-Barr Virus genome which causes our mapping rates to be low (~60-  
145 70%). This phenomenon is unique to viral-transformed cell lines like GM12878.

#### 146 *Replicates should be reproducible*

147 We recommend calculating Spearman's correlation values between ATAC-STARR-seq  
148 replicates (see methods). In STARR-seq-based methods, Spearman's correlation values > 0.7  
149 are typically sufficient for downstream analysis (Arnold et al. 2013; Barakat et al. 2018; Wang et  
150 al. 2018; Chaudhri et al. 2020; Glaser et al. 2021). Importantly, our analytical pipeline does not  
151 identify non-replicating regions as active or silent. Therefore, data for regions that are not  
152 reproducible should not manifest as false positives in our system. Less reproducibility, however,  
153 will lead to drop out and a greater false negative rate.

#### 154 *Assessment of Batch Effects*

155 While correlation scores are one measure of assessing batch effects between replicates,  
156 principal component analyses (PCA) can also provide critical insights into batch effects,  
157 particularly when several conditions are compared to each other. If batch effects are minimal,  
158 samples should cluster together only by condition and not by the batch in which they were  
159 processed. In our system, batch effects could contribute to false negatives, rather than false  
160 positives, as reproducibility is required for active and silent region calling to reach the necessary  
161 statistical significance. If needed, we recommend correcting for batch effects by including  
162 replicate number in the DESeq2 formula, i.e., ~ replicate + condition, as described in the  
163 DESeq2 vignette:  
164 (<http://bioconductor.org/packages/devel/bioc/vignettes/DESeq2/inst/doc/DESeq2.html>).



165 *Plasmid DNA data should meet general ATAC-seq standards*

166 Because plasmid DNA samples reflect ATAC-seq libraries, they should generally meet ATAC-  
167 seq quality thresholds, such as a FRiP score > 0.2. Importantly, a stringent q-value should be  
168 applied to yield between 50,000-110,000 ChrAcc peaks that represent about 2% of the human  
169 genome. The fragment size distribution should be bimodal with two peaks representing  
170 nucleosome free DNA fragments (>100bp) and mono-nucleosomal DNA fragments (~200bp).  
171 This should be determined prior to sequencing via tasesation (Supplemental Figure S2A) and  
172 during the analysis phase (Supplemental Figure S2B). We do not see the di-, tri-, quad-, etc.  
173 nucleosomal bands due to removal of large fragments via SPRI bead size selection in the  
174 plasmid library generation process.

## 175 **SUPPLEMENTAL METHODS**

### 176 **Determination of Harvest Time with Quantitative PCR**

177 GM12878 cells were cultured so that cell density was between 400,000 and 800,000 cells/mL  
178 on day of transfection. Three replicates were performed on separate days. For each sample, 5  
179 million GM12878 cells were electroporated with 5µg ATAC-STARR-seq plasmid DNA using the  
180 Neon™ Transfection System 100 µL Kit (Invitrogen, #MPK10025) and the associated Neon™  
181 Transfection System (Invitrogen, #MPK5000) in Buffer R with the following parameters: 1100V,  
182 30ms, and 2 pulses. Electroporated cells were dispensed immediately into pre-warmed T-12.5  
183 flasks containing 6.25mL of RPMI 1640 with 20% fetal bovine serum and 2mM GlutaMAX.

184 Total RNA was harvested at various time points—3hr, 6hr, 12hr, 24hr, and 36hr—using the  
185 TRizol™ Reagent and Phasemaker™ Tubes Complete System (Invitrogen™, #A33251). For  
186 each sample, 0.75mL TRizol was added to cell pellets. First-strand cDNA synthesis was  
187 performed using an Oligo (dT)<sub>25</sub> primer and the SuperScript™ IV First-Strand Synthesis System

188 (Invitrogen™, #18091050). cDNA was treated with RNase H to remove RNA from RNA-DNA  
189 dimers. For each replicate, 10μL quantitative PCR reactions were performed in technical  
190 triplicate using PowerUp™ SYBR™ Green Master Mix (Applied Biosystems™, #A25742) on a  
191 StepOnePlus™ Real-Time PCR System (Applied Biosystems™, #4376600). For each reaction,  
192 1μL of the reverse-transcribed product was added and gene-specific primers were supplied at a  
193 final concentration of 500nM (see Supplemental Table S4 for primer sequences). Fold-change  
194 was calculated with the  $\Delta\Delta C_t$  method, using either GAPDH or ACTB as the housekeeping gene  
195 for reporter RNA or ISG targets, respectively. Plots were made with ggplot2 (version 3.3.5)  
196 (Wickham 2016) in R (version 4.1.1).

### 197 **Plasmid Library Complexity Estimation**

198 Plasmid inserts were amplified via PCR for 10 cycles from 3.75μg ATAC-STARR-seq plasmid  
199 library using NEBNext® Ultra™ II Q5® Master Mix and the Nextera indexes, N505 and N701,  
200 see Supplemental Table S3 for primer sequences. Products were purified with the Zymo  
201 Research DNA Clean & Concentrator-5 kit (#D4013) and analyzed for concentration and size  
202 distribution using a HSD5000 screentape. Purified products were sequenced on an Illumina  
203 NovaSeq, PE150, at a requested read depth of 25 million reads through the Vanderbilt  
204 Technology for Advanced Genomics (VANTAGE) sequencing core.

### 205 **Transfection efficiency estimation**

206 Transfection efficiency is a critical ATAC-STARR-seq bottleneck, particularly for difficult to  
207 transfect cells like GM12878. In parallel with ATAC-STARR-seq, we electroporated GM12878  
208 cells with a pcDNA3.1-eGFP plasmid and estimated transfection efficiency as the percentage of  
209 GFP positive cells when measured by flow cytometry 24 hours later. Specifically, GM12878  
210 cells were electroporated following same conditions as above with either purified pcDNA3.1-

211 eGFP plasmid or nuclease-free water and then prepared for flow cytometry 24 hours later at a  
212 concentration of  $1.25 \times 10^6$  cells/mL in 1xPBS solution containing 1% BSA. We halved both GFP  
213 and water samples and stained one half of each with propidium iodide (Sigma-Aldrich, #P4864).  
214 Unstained cells (water/PI-) were used in conjunction with compensation control cells (GFP/PI- or  
215 water/PI+) to quantify the percentage of living GFP positive cells in the experimental condition  
216 (GFP/PI+) via flow cytometry; this percentage was the reported transfection efficiency. When  
217 performed in parallel to ATAC-STARR-seq plasmid library transfection, we consistently achieve  
218 around 10-20% efficiency (data not shown).

## 219 **Read Processing**

220 FASTQ files for the two Omni-ATAC-seq replicates from Corces *et al.* 2017 and all five HiDRA  
221 replicates from Wang *et al.* 2018 were downloaded from the NCBI sequence read archive (run  
222 codes: SRR5427886- SRR5427887 and SRR6050484-SRR6050523, respectively) and were  
223 processed using the same pipeline as ATAC-STARR-seq (Corces *et al.* 2017; Wang *et al.*  
224 2018). For this publicly available data and our own, FASTQ files were trimmed and analysed for  
225 quality with Trim Galore! (version 0.6.7,  
226 [https://www.bioinformatics.babraham.ac.uk/projects/trim\\_galore](https://www.bioinformatics.babraham.ac.uk/projects/trim_galore)) using the --fastqc and --paired  
227 parameters. Trimmed reads were mapped to hg38 with bowtie2 (version 2.3.5.1) using the  
228 following parameters: -X 500 --sensitive --no-discordant --no-mixed (Langmead and Salzberg  
229 2012). Mapped reads were filtered to remove reads with MAPQ < 30, reads mapping to  
230 mitochondrial DNA, and reads mapping to ENCODE blacklist regions using a variety of  
231 functions from the Samtools software package (version 1.13) (Li *et al.* 2009). When desired,  
232 duplicates were removed with the *markDuplicates* function from Picard (version 2.26.3)  
233 (<https://broadinstitute.github.io/picard/>). Read count was determined using the *flagstat* function  
234 from Samtools. Read counts for each step are provided in Supplemental Table S1. We also  
235 provide a python script on our GitHub repository (Hansen and Hodges 2022) that performs the

236 processing steps above. Complexity was estimated using the *lc-extrap* function from the Preseq  
237 package (version 2.0.0) (Daley and Smith 2013) and insert size was determined using the  
238 *CollectInsertSizeMetrics* function from Picard. Complexity curves were plotted in R with ggplot2.

## 239 **Accessibility Analysis**

240 *Peak Calling.* We called accessibility peaks with the Genrich software package (version 0.5,  
241 <https://github.com/jsh58/Genrich>), using deduplicated bam files. For ATAC-STARR-seq, we  
242 used all three replicates of reisolated plasmid samples. For Corces data, we used the two  
243 available replicates. For both, we set a false-discovery rate of 0.0001 and the *-j* parameter,  
244 which specifies ATAC-seq mode.

245 *Peak Comparisons.* Peaks between Corces and ATAC-STARR-seq plasmid DNA were  
246 compared using the *jaccard* function from the BEDTools package (version 2.30.0) (Quinlan and  
247 Hall 2010). FRiP scores (the fraction of reads in peaks) and the genomic fraction represented  
248 by each peak set was calculated using custom code available on our GitHub repository. Euler  
249 plots were made in R with the eulerr package (version 6.1.0) (Larsson 2021) and bar charts  
250 were made in R with ggplot2.

251 *Signal Tracks.* Accessibility signal tracks were generated with the *bamCoverage* function from  
252 the deepTools package (version 3.5.1) (Ramirez et al. 2016) using the following parameters: *-bs*  
253 *10 --normalizeUsing CPM -e --centerReads*. Signal was plotted using the Sushi package  
254 (version 1.30.0) (Phanstiel et al. 2014) in R.

## 255 **Active and Silent Region Calling**

256 We called active and silent regions using the sliding window and fragment groups methods. In  
257 both cases, except where specified, mapped read files containing duplicates were used for

258 region calling. Overlap between the two active region sets identified by each method was  
259 determined using BEDTools jaccard. Methods for each are listed below.

260 *Sliding Window.* Within ATAC-STARR-defined open chromatin regions, we generated 50 bp  
261 genomic, sliding window bins with a 10bp step size using the *makewindows* function and -s 10 -  
262 w 50 parameters from the BEDTools software package. Bins smaller than 50bp were removed  
263 from the analysis and reads were counted per bin for each replicate using the *featureCounts*  
264 function from the Subread package with the following parameters: -p -B -O --minOverlap 1 (Liao  
265 et al. 2014). The resulting counts matrix was pre-filtered to remove bins with zero counts and  
266 then analyzed with the DESeq2 software package (version 1.32.0) in R to identify active and  
267 silent bins (Love et al. 2014). Bins with an Benjamini–Hochberg (BH) adjusted p-value < 0.1 and  
268  $\log_2$  fold-change (RNA/DNA) > 0 were defined as active, whereas silent had a BH adjusted p-  
269 value < 0.1 and  $\log_2$  fold-change (RNA/DNA) < 0. Overlapping and book-ended bins were  
270 merged with the *merge* function from BEDTools (using default parameters), resulting in active  
271 and silent regions. A python script for region calling is available on our GitHub repository. For  
272 the sliding window strategy, we also performed the analysis with or without duplicates in order to  
273 compare the results. For the without-duplicate analysis, deduplicated bam files were used at the  
274 *featureCounts* step, otherwise all parameters were the same. Active regions were compared  
275 using the *jaccard* function from the BEDTools package. Scatter plots and correlation coefficients  
276 for replicate-to-replicate comparisons were generated by first extracting DESeq-normalized  
277 counts, using the *counts(normalized=TRUE)* function, plotted using ggplot2, and compared  
278 using the *cor.test()* function in R using both Spearman’s and pearson correlation methods.

279 *Fragment Groups.* We generated fragment groups using custom code based on the method  
280 described in Wang *et al* 2018 (Wang et al. 2018). Paired-end mapped reads were converted  
281 from bam to bed format using the *bamtobed* function from the BEDTools software package with  
282 option -bedpe and a custom *awk* function. Overlapping paired-end fragments were grouped

283 using the *bedmap* function from the BEDOPS software package (version 2.4.28) (Neph et al.  
284 2012) using the following parameters: `--count --echo-map-range --fraction-both 0.75`.  
285 Importantly, only fragment groups made up of 10 or more reads were used for downstream  
286 analysis. Reads were counted per fragment group for each replicate bam file using the  
287 *featureCounts* function from the Subread package (version 2.0.1) with the following parameters:  
288 `-p -B -O --minOverlap 1`. The resulting counts matrix was pre-filtered to remove bins with zero  
289 counts and then analyzed with the DESeq2 software package in R to identify active fragment  
290 groups. Fragment groups with an adjusted p-value  $< 0.1$  and  $\log_2$  fold-change (RNA/DNA)  $> 0$   
291 were defined as active. This method resulted in many fragment groups that overlapped each  
292 other, so we isolated the most active region within each overlap using a custom function  
293 available on our GitHub repository; the resulting, non-redundant regions were defined as active  
294 peaks.

## 295 **Replicate Count Effects**

296 *HiDRA replicate count comparison.* Raw HiDRA sequencing data was downloaded and  
297 processed as described in the read processing section above. Using the same bins generated  
298 and analyzed in the active and silent region calling section, reads from all five HiDRA replicates  
299 were counted per bin using the *featureCounts* function from the Subread package and the  
300 following parameters: `-p -B -O --minOverlap 1`. Active and regions were called in the same  
301 manner as described in the active and silent region calling section using either three or five  
302 replicates. Region counts for each condition were plotted using `ggplot2`.

303 *Pseudo-replicate analysis.* To create pseudo-replicates, all three replicate bam files of our  
304 ATAC-STARR data were merged using Samtools *merge*. Merged reads were split into five  
305 separate files using the Samtools *view* command with the `-s` options set to `$rep.2`, where `.2`  
306 represents 20% of the reads and `$rep` represents the seed number for random sampling. In this

307 way, each pseudo-replicate was sampled with a unique seed number and should, therefore  
308 differ from the other pseudo-replicates. Using the same bins analyzed in the active and silent  
309 region calling section, reads from all five pseudo-replicates were counted per bin and active  
310 regions were called in the same manner as described in the active and silent region calling  
311 section using two, three, four, or five pseudo-replicates. Region counts for each condition were  
312 plotted using ggplot2.

### 313 **Short vs. Long DNA Fragment Analysis**

314 Reads were split from filtered bam files (read duplicates included) into short and long groups  
315 using samtools *view* piped to an awk command that filters paired end fragments shorter/equal to  
316 125nts (awk 'substr(\$0,1,1)=="@" || (\$9<= 125 && \$9>=0) || (\$9>= -125 && \$9<=0)') or longer  
317 than 125nts (awk 'substr(\$0,1,1)=="@" || (\$9> 125) || (\$9<-125)'). Read counts were performed  
318 with samtools *flagstat*. Active and silent regulatory regions were called in the same manner as  
319 described above using the "sliding windows" approach. Overlaps were calculated using bedtools  
320 *jaccard* (default parameters). Region size was calculated in R and annotation was performed  
321 using the ChIPSeeker package (version 1.28.3) (Yu et al. 2015); promoters were defined as 2kb  
322 upstream and 1kb downstream of a TSS. All plots were made using ggplot2 in R.

### 323 **Orientation Analysis**

324 Replicate bam files were merged using Samtools *merge*. Reads were split by orientation using  
325 Samtools *view -f*, which selects reads based on their SAM flags. Reads with flags 99 and 147  
326 were assigned to the 5'-3' bam file, while reads with flags 83 and 163 were assigned to the 3'-5'  
327 bam file. The same bins generated and analyzed for region calling were used. Bins designated  
328 as active and silent were used for the active only and silent only analysis, respectively. The  
329 three bin sets were further subset into proximal and distal based on distance to the nearest TSS

330 using the ChIPSeeker software package; proximal bins were defined as 2kb upstream and 1kb  
331 downstream of a TSS while distal was everything else. For each subset of bins, reads were  
332 counted per bin for the orientation-specific bam files using the *featureCounts* function from the  
333 Subread package with the following parameters: -p -B -O --minOverlap 1. Scatter plots of counts  
334 per million normalize read count were generated with ggplot2 and both Spearman's and  
335 pearson correlation coefficients were determined with the *cor.test()* function in R. Bins with a  
336 greater than 5 read count difference between insert orientations were considered to be biased;  
337 we based this threshold on the all distal bins scatterplot with the assumption that distal bins  
338 should not display an orientation bias. The percentage biased was plotted with ggplot2.

### 339 **Active and Silent Peak Characterization**

340 *Annotation.* Active and silent peak sets were annotated relative to transcription start site (TSS)  
341 locations and plotted in R using the ChIPSeeker package (version 1.28.3) (Yu et al. 2015);  
342 promoters were defined as 2kb upstream and 1kb downstream of a TSS. ChromHMM state was  
343 assigned to each peak using the BEDTools *intersect* function and -u parameter; the list of hg38  
344 18-state ChromHMM regions (Roadmap Epigenomics et al. 2015)  
345 ([https://egg2.wustl.edu/roadmap/data/byFileType/chromhmmSegmentations/ChmmModels/core](https://egg2.wustl.edu/roadmap/data/byFileType/chromhmmSegmentations/ChmmModels/core_K27ac/jointModel/final/E116_18_core_K27ac_hg38lift_mnemonics.bed.gz)  
346 [\\_K27ac/jointModel/final/E116\\_18\\_core\\_K27ac\\_hg38lift\\_mnemonics.bed.gz](https://egg2.wustl.edu/roadmap/data/byFileType/chromhmmSegmentations/ChmmModels/core_K27ac/jointModel/final/E116_18_core_K27ac_hg38lift_mnemonics.bed.gz)) were intersected  
347 against the regions sets of interest and the proportion was plotted with ggplot2.

348 *Heatmaps.* The activity bigwig was generated with the deepTools package. Merged bam files for  
349 RNA and DNA were converted to counts per million normalized bedGraph files using the  
350 *bamCoverage* function and the following parameters: -bs 10 --normalizeUsing CPM. The  
351 resulting RNA bigwig was normalized to the DNA bigwig to generate a signal file of  
352  $\log_2(\text{RNA/DNA})$  ratio using the *bigwigCompare* function and the following parameters: -bs 1 --  
353 operation log2 --pseudocount 1 --skipZeroOverZero. Heatmaps were generated using the



354 deepTools package. Activity signal was plotted at distal and proximal regions and region order  
355 was ranked by maximum mean signal. GM12878 ChIP-seq bigwig files were downloaded from  
356 the ENCODE consortium (The ENCODE Project Consortium et al. 2020) and plotted. The  
357 matrix was made using the *computeMatrix* function, with the following parameters: -a 2000 -b  
358 2000 --referencePoint center -bs 10 --missingDataAsZero. The matrix was plotted using the  
359 *plotHeatmap* function with the following key parameters: --sortUsing mean --sortUsingSamples  
360 1.

361 *Histone Signal Boxplots.* We intersected silent and active regions with our accessible peaks file  
362 using the *intersect* function from the BEDTools software package to get peaks that contain an  
363 active region, a silent region, both an active and silent region, or neither. Using the *slop* function  
364 from BEDTools we then extended ChrAcc peaks by 1kb on either side and then used the  
365 *bigwigCompare* function from the DeepTools package to determine  
366 H3K4me1/H3K4me3/H3K27ac/H3Kme3 GM12878 ChIP-seq bigwig signal distributions for each  
367 for the ChrAcc peak types. The same ENCODE files used in the heatmap analysis above, were  
368 also used here. The plotted values represent the average *fold-change over control* for each  
369 ChrAcc peak +/- 1kb. Plots were made with ggplot2.

370 *Motif enrichment.* We performed motif enrichment on the active and silent peak sets using the  
371 *findMotifsGenome.pl* script from the HOMER package (version 4.10, <http://homer.ucsd.edu/>)  
372 (Duttke et al. 2019) using the following parameters: -size given -mset vertebrates. Plots were  
373 made with ggplot2.

374 *Neutral region calling.*

375 Neutral regions were called in the exact same manner as active or silent except for one critical  
376 difference: only bins with  $\text{padj} > 0.1$  were selected. Annotation of distance to nearest TSS and  
377 ChromHMM were performed as described for the active and silent regions above.

## 378 **TF footprinting**

379 *Computational footprinting.* Transcription factor footprinting was performed using the TOBIAS  
380 software package (version 0.12.12) (Bentsen et al. 2020). Deduplicated mapped reads were  
381 used to generate Tn5-bias corrected bigwig signal files using the *ATACorrect* function. Using  
382 the corrected signal files, TF binding was calculated with the *ScoreBigWig* function and  
383 footprints for individual TFs were called for all core non-redundant vertebrate JASPAR motifs  
384 (Fornes et al. 2020) using the *BINDetect* function. Motifs with a footprint were classified as  
385 “bound”, while motifs without a footprint were classified as “unbound”. The “archetype” for each  
386 TF was assigned by cross-referencing the motif annotations table from Viestra *et al.* 2020  
387 (Vierstra et al. 2020).

388 *Data Visualization.* Heatmaps were generated using the deepTools package. GM12878 ChIP-  
389 seq bigwig files were downloaded from ENCODE ([www.encodeproject.org](http://www.encodeproject.org)) (The ENCODE  
390 Project Consortium et al. 2020) and plotted with Tn5-corrected signal at all accessible CTCF  
391 and ETS/1 motifs (defined as the “all” bed file for CTCF or ETS1 from BINDetect) using the  
392 *computeMatrix reference-point* function with the following key parameters: `-a 200 -b 200 --`  
393 `referencePoint center --missingDataAsZero -bs1`. The resulting matrix was plotted using the  
394 *plotHeatmap* function and the following key parameters: `--sortUsing mean --sortUsingSamples`  
395 1. Aggregate plots were also generated using the deepTools package. Tn5-corrected signal was  
396 measured at bound and unbound sites for each TF archetype using the *computeMatrix*  
397 *reference-point* function with the following key parameters: `-a 75 -b 75 --referencePoint center -`  
398 `-missingDataAsZero -bs 1`. The resulting matrix was plotted using the *plotProfile* function.

## 399 **Integration of Regulatory Activity, Chromatin Accessibility, and TF footprinting**

400 Signal and regions were visualized at the given locus using the Sushi package in R. To  
401 determine the presence or absence of a TF footprint, we intersected TF footprints with the  
402 active and silent regions bed file and reported +/- for presence of the footprint using custom  
403 code available on our GitHub repository. Footprints were selected based on top hits from the  
404 motif enrichment analysis above. Active and silent regions without a footprint for the queried  
405 TFs were removed from the analysis. We clustered the region subsets with the pheatmap  
406 package (version 1.0.12, <https://github.com/raivokolde/pheatmap>), using the  
407 `clustering_distance_row/columns = "binary"` parameter; we cut the tree into 6 clusters for active  
408 and silent. We extracted the regions from each cluster and then, using the ChIPSeeker  
409 package, assigned the nearest neighbor gene. Using ClusterProfiler (Yu et al. 2012) and  
410 ReactomePA (Jassal et al. 2020), we then performed reactome pathway enrichment analysis on  
411 the nearest neighbor gene sets. We applied a 0.05 and 0.1 p-value cut-off for active and silent  
412 clusters, respectively.

## 413 **SUPPLEMENTAL FIGURE LEGENDS**

414 **Supplemental Figure S1. ATAC-STARR Optimization.** (A) Estimated complexity curve for the  
415 GM12878 ATAC-STARR plasmid library. Dashed lines represent predicted values from  
416 Preseq's `lc-extrap`. The associated ribbon plots (light blue) represent the 95% confidence  
417 interval reported with the predicted value. (B) Relative expression of reporter RNAs and three  
418 interferon-stimulated genes (*IFNB1*, *IFIT2*, and *ISG15*) at varying timepoints between 0- and 36-  
419 hours post-electroporation. For each analysis, fold-change values are relative to the  
420 untransfected condition. Three replicates were isolated and quantified for each timepoint.

421 **Supplemental Figure S2. Characterization of ATAC-STARR sequencing libraries.** (A)  
422 Agilent TapeStation results for relevant steps of ATAC-STARR, this includes the following:  
423 tagmented products, plasmid library inserts, and Illumina sequencing libraries for all three  
424 replicates of DNA and RNA. Tagmented products lack the full Illumina adapter and therefore are  
425 about 100bp smaller than their later-stage counterparts. They also include larger fragments  
426 which were removed via selection before the cloning step. The Illumina-ready libraries were  
427 amplified using a minimal PCR cycle number and therefore the plasmid or cDNA template as  
428 well as the first and second round products can be seen as larger material—this material is not  
429 sequence-able as it lacks at least one of the adapters required for cluster amplification. (B)  
430 Insert size distribution of ATAC-STARR-seq reads, as quantified by Picard's  
431 CalculateInsertSizeMetrics. (C) Estimated complexity curves for ATAC-STARR sequencing  
432 libraries. Dashed lines represent predicted values from Preseq's lc-extrap. The associated  
433 ribbon plots (light blue) represent the 95% confidence interval reported with the predicted value.

434 **Supplemental Figure S3. Correlation between ATAC-STARR-seq replicates.** Scatter plots  
435 of DESeq2-normalized read counts per bin between replicates for both (A) DNA and (B) RNA  
436 samples. Pearson ( $r^2$ ) and Spearman's ( $\rho$ ) correlation coefficients are indicated in the top left  
437 corner for each pairwise comparison.

438 **Supplemental Figure S4. Comparison between the sliding window and the fragment**  
439 **group active region calling methods.** (A) Diagram of the fragment group region calling  
440 scheme. Paired-end fragments from the DNA samples are first assembled into "fragment  
441 groups" (FGs) which represent groups of more than 10 paired-end fragments with each  
442 fragment overlapping another fragment by at least 75%. Like the sliding window method, reads  
443 from RNA and DNA samples are then assigned to each FG and active FGs are identified using  
444 differential analysis with DESeq. The same padj ( $<0.05$ ) and  $\log_2$ fold-change ( $>0$ ) filters are  
445 applied. For FGs that overlap, the FG with the largest activity score is isolated. (B) The number

446 of active regions called with either method. (C) Euler plot comparing the region overlap between  
447 the two methods.

448 **Supplemental Figure S5. Analysis of replicate count on region calling sensitivity.** (A)

449 Number of active regions called using HiDRA data with either 3 or 5 replicates. Current ATAC-  
450 STARR-seq active region number is plotted for comparison. (B) Number of active regions called  
451 when 2, 3, 4, or 5 pseudoreplicates are provided. To generate pseudoreplicates, replicates were  
452 merged and then split into 5 separate files.

453 **Supplemental Figure S6. Comparison between keeping duplicates and removing**

454 **duplicates to call active regions.** (A-B) Scatter plots of DESeq2-normalized read counts per  
455 bin between replicates for both (A) DNA and (B) RNA samples when duplicates are removed.  
456 Pearson ( $r^2$ ) and Spearman's ( $\rho$ ) correlation coefficients are indicated in the top left corner for  
457 each pairwise comparison. (C) The number of active regions called with or without duplicates.  
458 (D) Euler plot comparing the region overlap between the two methods.

459 **Supplemental Figure S7. Effect of fragment length on regulatory region calls.** ATAC-

460 STARR-seq fragments were parsed into "long" and "short" files based on whether they were  
461 greater than or less than or equal to 125nt. (A) read counts of each fragment length  
462 classification for each replicate for both plasmid DNA and reporter RNA samples. (B) Active  
463 and silent region counts using only long fragments, only short fragments, or both. (C) Boxplots  
464 of basepair (bp) length for the active and silent region sets called for each fragment length  
465 classification. (D) Annotation of regulatory regions relative to the transcriptional start site (TSS).  
466 The promoter is defined as 2kb upstream and 1 kb downstream of the TSS. (E) Venn diagrams  
467 representing the amount of active or silent region overlap between the region sets called from  
468 each fragment length classification.

469 **Supplemental Figure S8. Assessment of potential orientation bias in ATAC-STARR-seq**  
470 **data.** (A) Schematic of the method for separating reads based on insert orientation. Read 1 and  
471 Read 2 are sequenced from the same position regardless of insert orientation on the plasmid  
472 and reporter RNA samples. Therefore, insert orientation can be specified based on how the  
473 read pair map to the genome. 5'-3' inserts have R1 on the top strand, while 3' -5' inserts have  
474 R1 on the bottom strand. (B-G) Scatter plots of counts per million normalized reporter RNA read  
475 counts between 5' to 3' inserts and 3' to 5' inserts for (B) all proximal bins analyzed, (C) all distal  
476 bins analyzed, (D) active proximal bins only, (E) active distal bins only, (F) silent proximal bins  
477 only or (G) silent distal bins only. Pearson ( $r^2$ ) and Spearman's ( $\rho$ ) correlation coefficients are  
478 indicated in the top left corner for each pairwise comparison. Proximal bins were defined as  
479 within 2kb upstream and 1kb downstream of a transcription start site, while distal bins were  
480 defined as everything else. Dashed lines indicate +/- 5 counts from the expectation ( $y=x$ ). The  
481 percentage of bins that lie outside of these lines are denoted in (H).

482 **Supplemental Figure S9. Additional Characterization of ATAC-STARR-seq Regulatory**  
483 **Regions.** (A) Histone modification ChIP-seq signal at accessible chromatin peaks. Boxplot of  
484 the distribution of histone modification ChIP-seq signal for accessible chromatin peaks (ChrAcc)  
485 that contain an active region, a silent region, both an active and silent region, or neither  
486 (neutral). Values represents the average fold change over control signal per region for each  
487 histone modification. (B) Annotation of regulatory regions relative to the transcriptional start site  
488 (TSS). The promoter is defined as 2kb upstream and 1 kb downstream of the TSS. (C)  
489 Annotation of regulatory regions by the ChromHMM 18-state model for GM12878 cells.

## 490 **SUPPLEMENTAL REFERENCES**

491 Arnold CD, Gerlach D, Stelzer C, Boryn LM, Rath M, Stark A. 2013. Genome-wide quantitative  
492 enhancer activity maps identified by STARR-seq. *Science* **339**: 1074-1077.

493 Barakat TS, Halbritter F, Zhang M, Rendeiro AF, Perenthaler E, Bock C, Chambers I. 2018.  
494 Functional Dissection of the Enhancer Repertoire in Human Embryonic Stem Cells. *Cell*  
495 *Stem Cell* **23**: 276-288 e278.

496 Bentsen M, Goymann P, Schultheis H, Klee K, Petrova A, Wiegandt R, Fust A, Preussner J,  
497 Kuenne C, Braun T et al. 2020. ATAC-seq footprinting unravels kinetics of transcription  
498 factor binding during zygotic genome activation. *Nat Commun* **11**: 4267.

499 Chaudhri VK, Dienger-Stambaugh K, Wu Z, Shrestha M, Singh H. 2020. Charting the cis-  
500 regulome of activated B cells by coupling structural and functional genomics. *Nat*  
501 *Immunol* **21**: 210-220.

502 Corces MR, Trevino AE, Hamilton EG, Greenside PG, Sinnott-Armstrong NA, Vesuna S,  
503 Satpathy AT, Rubin AJ, Montine KS, Wu B et al. 2017. An improved ATAC-seq protocol  
504 reduces background and enables interrogation of frozen tissues. *Nat Methods* **14**: 959-  
505 962.

506 Daley T, Smith AD. 2013. Predicting the molecular complexity of sequencing libraries. *Nat*  
507 *Methods* **10**: 325-327.

508 Duttke SH, Chang MW, Heinz S, Benner C. 2019. Identification and dynamic quantification of  
509 regulatory elements using total RNA. *Genome Res* **29**: 1836-1846.

510 Fornes O, Castro-Mondragon JA, Khan A, van der Lee R, Zhang X, Richmond PA, Modi BP,  
511 Correard S, Gheorghe M, Baranasic D et al. 2020. JASPAR 2020: update of the open-  
512 access database of transcription factor binding profiles. *Nucleic Acids Res* **48**: D87-D92.

513 Glaser LV, Steiger M, Fuchs A, van Bommel A, Einfeldt E, Chung HR, Vingron M, Meijnsing SH.  
514 2021. Assessing genome-wide dynamic changes in enhancer activity during early mESC  
515 differentiation by FAIRE-STARR-seq. *Nucleic Acids Res* **49**: 12178-12195.

516 Hansen TJ, Hodges E. 2022. Identifying transcription factor-bound activators and silencers in  
517 the chromatin accessible human genome using ATAC-STARR-seq (V2.1.0).  
518 [githubcom/HodgesGenomicsLab/ATAC-STARR-seq](https://github.com/HodgesGenomicsLab/ATAC-STARR-seq) doi:10.5281/zenodo.6640476.

519 Jassal B, Matthews L, Viteri G, Gong C, Lorente P, Fabregat A, Sidiropoulos K, Cook J,  
520 Gillespie M, Haw R et al. 2020. The reactome pathway knowledgebase. *Nucleic Acids*  
521 *Res* **48**: D498-D503.

522 Lamarre S, Frasse P, Zouine M, Labourdette D, Sainderichin E, Hu G, Le Berre-Anton V,  
523 Bouzayen M, Maza E. 2018. Optimization of an RNA-Seq Differential Gene Expression  
524 Analysis Depending on Biological Replicate Number and Library Size. *Front Plant Sci* **9**:  
525 108.

526 Langmead B, Salzberg SL. 2012. Fast gapped-read alignment with Bowtie 2. *Nat Methods* **9**:  
527 357-359.

528 Larsson J. 2021. eulerr: Area-Proportional Euler and Venn Diagrams with Ellipses.

529 Li H, Handsaker B, Wysoker A, Fennell T, Ruan J, Homer N, Marth G, Abecasis G, Durbin R,  
530 Genome Project Data Processing S. 2009. The Sequence Alignment/Map format and  
531 SAMtools. *Bioinformatics* **25**: 2078-2079.

532 Liao Y, Smyth GK, Shi W. 2014. featureCounts: an efficient general purpose program for  
533 assigning sequence reads to genomic features. *Bioinformatics* **30**: 923-930.

534 Love MI, Huber W, Anders S. 2014. Moderated estimation of fold change and dispersion for  
535 RNA-seq data with DESeq2. *Genome Biol* **15**: 550.

536 Muerdter F, Boryn LM, Woodfin AR, Neumayr C, Rath M, Zabidi MA, Pagani M, Haberle V,  
537 Kazmar T, Catarino RR et al. 2018. Resolving systematic errors in widely used enhancer  
538 activity assays in human cells. *Nat Methods* **15**: 141-149.

539 Neph S, Kuehn MS, Reynolds AP, Haugen E, Thurman RE, Johnson AK, Rynes E, Maurano  
540 MT, Vierstra J, Thomas S et al. 2012. BEDOPS: high-performance genomic feature  
541 operations. *Bioinformatics* **28**: 1919-1920.

542 Phanstiel DH, Boyle AP, Araya CL, Snyder MP. 2014. Sushi.R: flexible, quantitative and  
543 integrative genomic visualizations for publication-quality multi-panel figures.  
544 *Bioinformatics* **30**: 2808-2810.



545 Quinlan AR, Hall IM. 2010. BEDTools: a flexible suite of utilities for comparing genomic  
546 features. *Bioinformatics* **26**: 841-842.

547 Ramirez F, Ryan DP, Gruning B, Bhardwaj V, Kilpert F, Richter AS, Heyne S, Dundar F, Manke  
548 T. 2016. deepTools2: a next generation web server for deep-sequencing data analysis.  
549 *Nucleic Acids Res* **44**: W160-165.

550 Roadmap Epigenomics C, Kundaje A, Meuleman W, Ernst J, Bilenky M, Yen A, Heravi-  
551 Moussavi A, Kheradpour P, Zhang Z, Wang J et al. 2015. Integrative analysis of 111  
552 reference human epigenomes. *Nature* **518**: 317-330.

553 Schurch NJ, Schofield P, Gierlinski M, Cole C, Sherstnev A, Singh V, Wrobel N, Gharbi K,  
554 Simpson GG, Owen-Hughes T et al. 2016. How many biological replicates are needed in  
555 an RNA-seq experiment and which differential expression tool should you use? *RNA* **22**:  
556 839-851.

557 The ENCODE Project Consortium, Moore JE, Purcaro MJ, Pratt HE, Epstein CB, Shores N,  
558 Adrian J, Kawli T, Davis CA, Dobin A et al. 2020. Expanded encyclopaedias of DNA  
559 elements in the human and mouse genomes. *Nature* **583**: 699-710.

560 Vierstra J, Lazar J, Sandstrom R, Halow J, Lee K, Bates D, Diegel M, Dunn D, Neri F, Haugen  
561 E et al. 2020. Global reference mapping of human transcription factor footprints. *Nature*  
562 **583**: 729-736.

563 Wang X, He L, Goggin SM, Saadat A, Wang L, Sinnott-Armstrong N, Claussnitzer M, Kellis M.  
564 2018. High-resolution genome-wide functional dissection of transcriptional regulatory  
565 regions and nucleotides in human. *Nat Commun* **9**: 5380.

566 Wickham H. 2016. ggplot2: Elegant Graphics for Data Analysis.

567 Yu G, Wang LG, Han Y, He QY. 2012. clusterProfiler: an R package for comparing biological  
568 themes among gene clusters. *OMICS* **16**: 284-287.

569 Yu G, Wang LG, He QY. 2015. ChIPseeker: an R/Bioconductor package for ChIP peak  
570 annotation, comparison and visualization. *Bioinformatics* **31**: 2382-2383.

**SUPPLEMENTARY TABLES**

**Supplementary Table 1: A comparison of experimental differences and result metrics between accessible chromatin coupled to STARR-seq techniques.**

| Type                            | Description                                                   | ATAC-STARR-seq (Hansen & Hodges, this report)                     | HiDRA (Wang et al. 2018)                              | FAIRE-STARR-seq (Chaudhri et al. 2020)                  |
|---------------------------------|---------------------------------------------------------------|-------------------------------------------------------------------|-------------------------------------------------------|---------------------------------------------------------|
| <b>Experimental Differences</b> | <i>Cell type</i>                                              | GM12878                                                           | GM12878                                               | Purified murine splenic B cells                         |
|                                 | <i>Accessible chromatin extraction process</i>                | ATAC-seq (Tn5-tagmentation)                                       | ATAC-seq (Tn5-tagmentation)                           | FAIRE-seq (crosslinking-based)                          |
|                                 | <i>mtDNA removal process</i>                                  | Omni-ATAC (detergent-based)                                       | CRISPR against mtDNA gRNAs                            | none                                                    |
|                                 | <i>Size selection</i>                                         | 0-500bp                                                           | 150-500bp                                             | 300-700bp                                               |
|                                 | <i>Reporter plasmid promoter</i>                              | Bacterial origin of replication (ORI)                             | Super Core Promoter 1                                 | Super Core Promoter 1                                   |
|                                 | <i>Manner of plasmid library sequence library preparation</i> | Reisolated after electroporation (in parallel with reporter RNAs) | Sequenced as-is, no reisolation after electroporation | Not sequenced                                           |
|                                 | <i>Analysis</i>                                               | Sliding windows & DESeq2                                          | Fragment groups & DESeq2                              | Homer <i>findPeaks</i> , no normalization to DNA        |
| <b>Result metrics</b>           | <i>Library Complexity</i>                                     | ~50 million                                                       | 9.7 million                                           | Not reported directly, ~81% coverage of input FAIRE-DNA |
|                                 | <i>Number of active regions called</i>                        | 30,078 active regions                                             | 66,254 active HiDRA regions                           | 11,809 STARR-positive regions                           |
|                                 | <i>Number of silent regions called</i>                        | 21,125 silent regions                                             | <i>None reported</i>                                  | <i>None reported</i>                                    |
|                                 | <i>Number of accessible chromatin peaks called</i>            | 101,904 peaks                                                     | <i>None reported</i>                                  | 55,133 peaks (from FAIRE-seq not the plasmid library)   |
|                                 | <i>Number of TFs footprinted</i>                              | 746 TFs                                                           | <i>None reported</i>                                  | <i>None reported</i>                                    |
|                                 | <i>Number of SHARPER-RE driver elements identified</i>        | <i>None reported</i>                                              | ~13,000                                               | <i>None reported</i>                                    |

**Supplementary Table 2. ATAC-STARR-seq Sequencing Summary Statistics.**

| Metric                                                     | Plasmid Library                                        | DNA Rep 1  | DNA Rep 2  | DNA Rep 3  | RNA Rep 1   | RNA Rep 2   | RNA Rep 3   |
|------------------------------------------------------------|--------------------------------------------------------|------------|------------|------------|-------------|-------------|-------------|
| <b>Total read count (paired end)</b>                       | 113,978,542                                            | 55,453,364 | 47,609,989 | 81,350,911 | 101,163,327 | 122,274,760 | 103,410,392 |
| <b>Filtered read count (paired end)</b>                    | 66,730,249                                             | 30,803,098 | 26,530,451 | 44,046,983 | 56,307,716  | 67,956,476  | 56,098,454  |
| <b>Filtered &amp; deduplicated read count (paired end)</b> | 29,482,015                                             | 22,626,181 | 20,015,687 | 28,369,114 | 11,385,851  | 8,122,462   | 9,285,796   |
| <b>Trimming Rate</b>                                       | 79.7%                                                  | 76%        | 79%        | 82%        | 76%         | 76%         | 76%         |
| <b>Mapping Rate (&gt;30MAPQ)</b>                           | 73%                                                    | 61%        | 61%        | 59%        | 61%         | 61%         | 59%         |
| <b>% mtDNA reads</b>                                       | 19.13%                                                 | 8.6%       | 8.7%       | 8.6%       | 8.6%        | 8.6%        | 8.3%        |
| <b>% ENCODE blacklist reads</b>                            | 0.147%                                                 | 0.05%      | 0.05%      | 0.05%      | 0.05%       | 0.05%       | 0.05%       |
| <b>Duplication rate</b>                                    | 56%                                                    | 27%        | 25%        | 35.6%      | 80%         | 88%         | 83%         |
| <b>Number of PCR Cycles</b>                                | 10                                                     | 8          | 8          | 8          | 13          | 13          | 12          |
| <b>FastQC fields failed</b>                                | Per base sequence content, Sequence Duplication Levels |            |            |            |             |             |             |

\*Plasmid library column represents data from the library complexity check.

**Supplementary Table 3. Genrich peak counts for varying FDR thresholds.**

| Sample            | FDR < 0.01 | FDR < 0.001   | FDR < 0.0001   | FDR < 0.00001 |
|-------------------|------------|---------------|----------------|---------------|
| <b>Corces</b>     | 133,007    | <u>89,829</u> | 66,471         | 50,784        |
| <b>ATAC-STARR</b> | 162,877    | 124,612       | <u>101,904</u> | 85,668        |

\*Underlined values indicate the peak sets that were analyzed further.

Supplementary Table 4 contains oligo sequences used in ATAC-STARR-seq and qPCR. It is included as a separate excel file.

**A**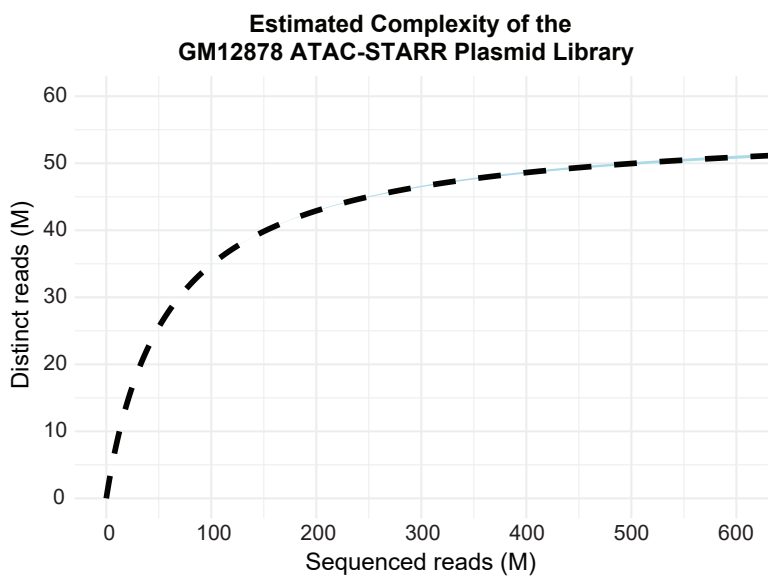**B**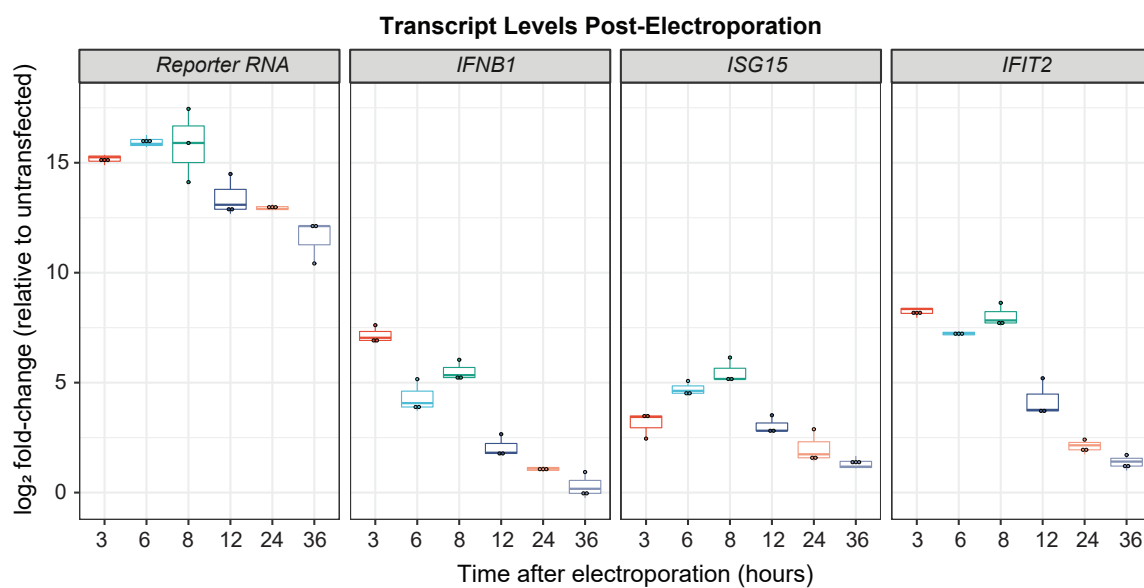

**Supplementary Figure 1. ATAC-STARR Optimization.** (A) Estimated complexity curve for the GM12878 ATAC-STARR plasmid library. Dashed lines represent predicted values from Preseq's lc-extrap. The associated ribbon plots (light blue) represent the 95% confidence interval reported with the predicted value. (B) Relative expression of reporter RNAs and three interferon-stimulated genes (*IFNB1*, *IFIT2*, and *ISG15*) at varying timepoints between 0- and 36-hours post-electroporation. For each analysis, fold-change values are relative to the untransfected condition. Three replicates were isolated and quantified for each timepoint.

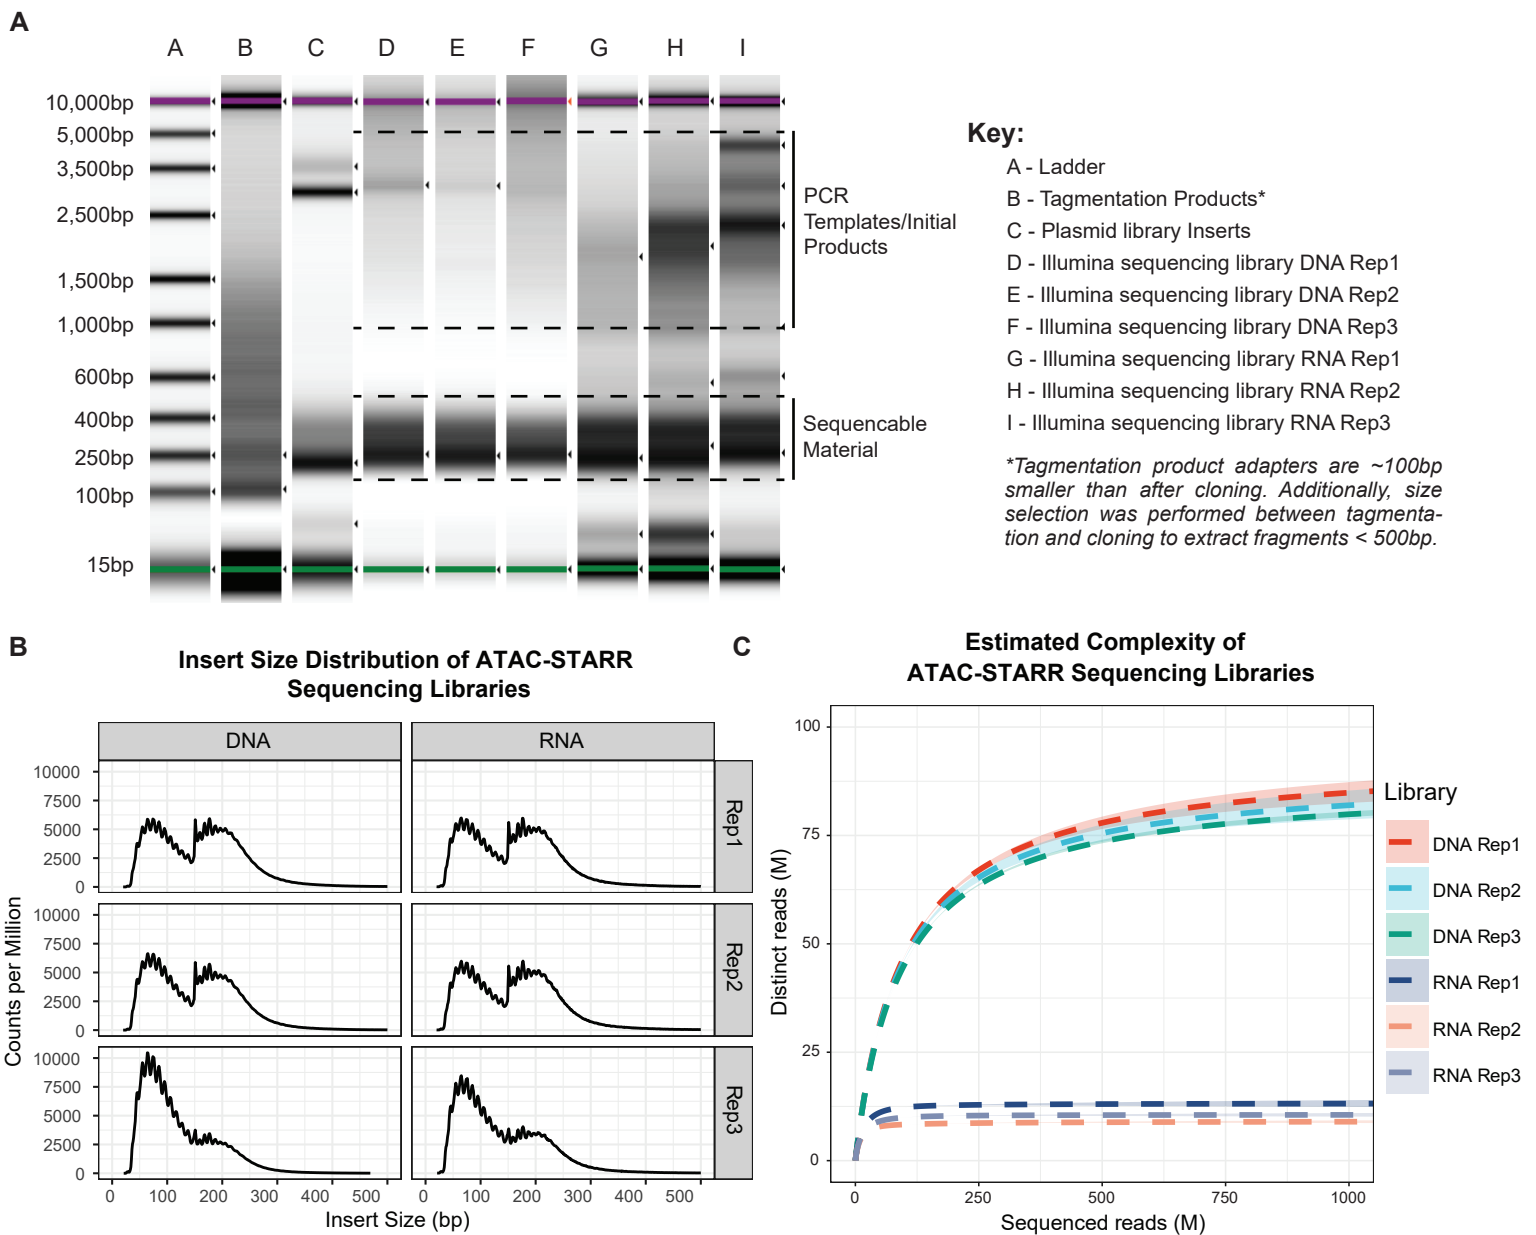

**Supplementary Figure 2. Characterization of ATAC-STARR sequencing libraries.** (A) Agilent TapeStation results for relevant steps of ATAC-STARR, this includes the following: tagmented products, plasmid library inserts, and Illumina sequencing libraries for all three replicates of DNA and RNA. Tagmented products lack the full Illumina adapter and therefore are about 100bp smaller than their later-stage counterparts. They also include larger fragments which were removed via selection before the cloning step. The Illumina-ready libraries were amplified using a minimal PCR cycle number and therefore the plasmid or cDNA template as well as the first and second round products can be seen as larger material—this material is not sequence-able as it lacks at least one of the adapters required for cluster amplification. (B) Insert size distribution of ATAC-STARR-seq reads, as quantified by Picard's *CalculateInsertSizeMetrics*. (C) Estimated complexity curves for ATAC-STARR sequencing libraries. Dashed lines represent predicted values from Preseq's *Ic-extrap*. The associated ribbon plots (light blue) represent the 95% confidence interval reported with the predicted value.

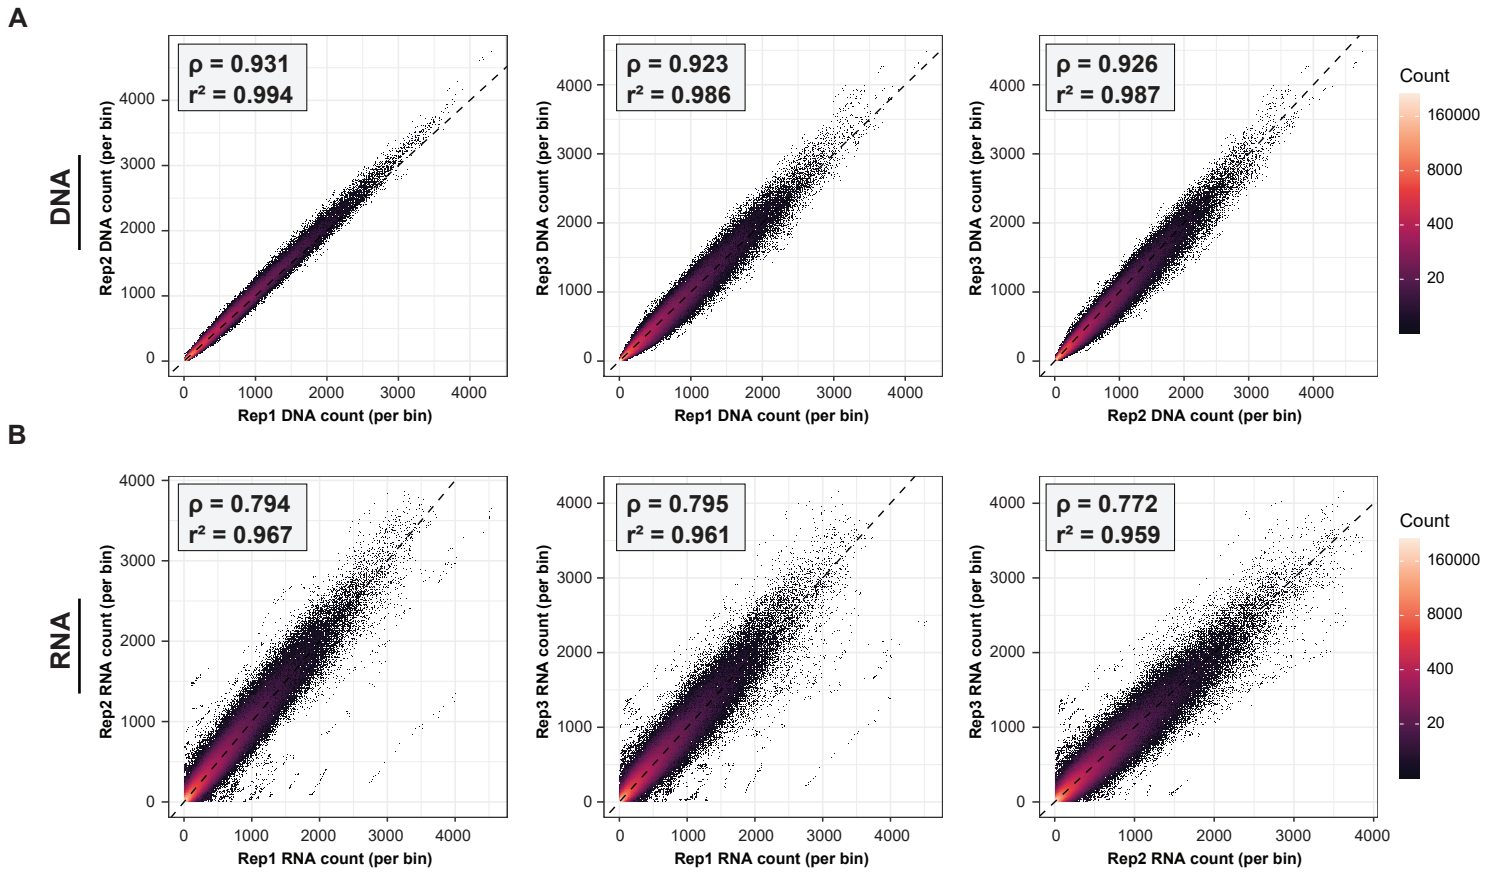

**Supplementary Figure 3. Correlation between ATAC-STARR-seq replicates.** Scatter plots of DESeq2-normalized read counts per bin between replicates for both (A) DNA and (B) RNA samples. Pearson ( $r^2$ ) and Spearman's ( $\rho$ ) correlation coefficients are indicated in the top left corner for each pairwise comparison.

**A**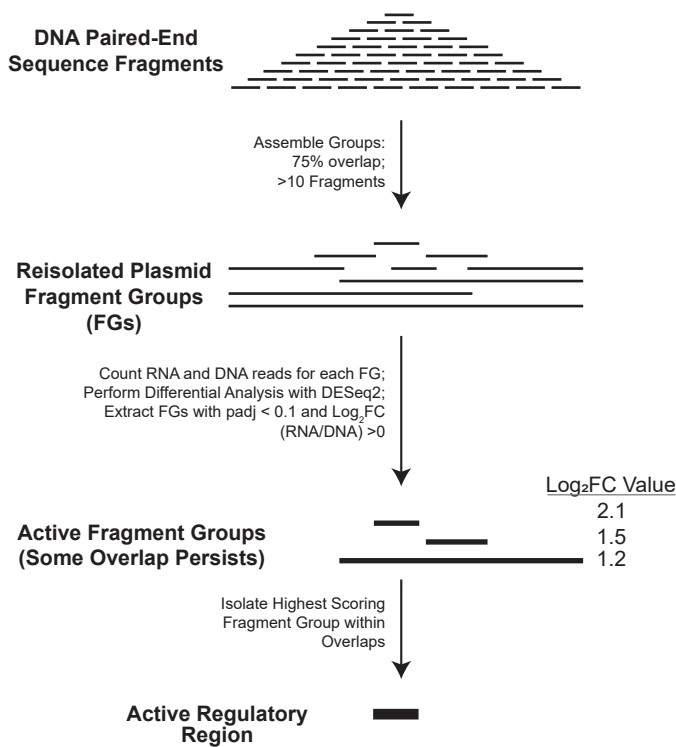**B**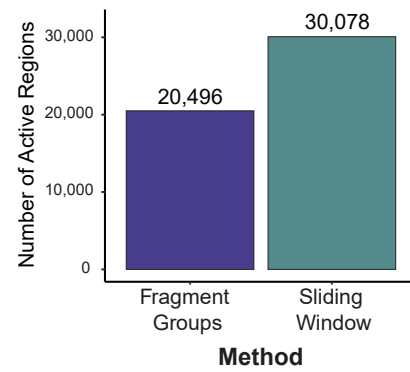**C**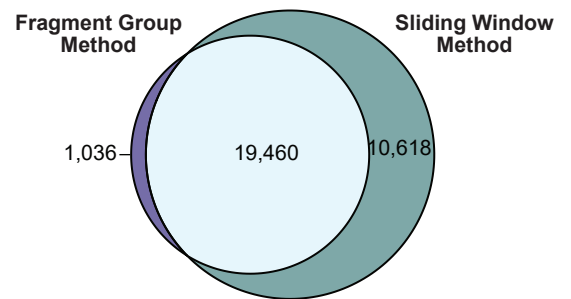

**Supplementary Figure 4. Comparison between the sliding window and the fragment group active region calling methods.**

(A) Diagram of the fragment group region calling scheme. Paired-end fragments from the DNA samples are first assembled into “fragment groups” (FGs) which represent groups of more than 10 paired-end fragments with each fragment overlapping another fragment by at least 75%. Similar to the sliding window method, reads from RNA and DNA samples are then assigned to each FG and active FGs are identified using differential analysis with DESeq. The same  $padj < 0.05$  and  $log_2$ fold-change ( $> 0$ ) filters are applied. For FGs that overlap, the FG with the largest activity score is isolated. (B) The number of active regions called with either method. (C) Euler plot comparing the region overlap between the two methods.

**A**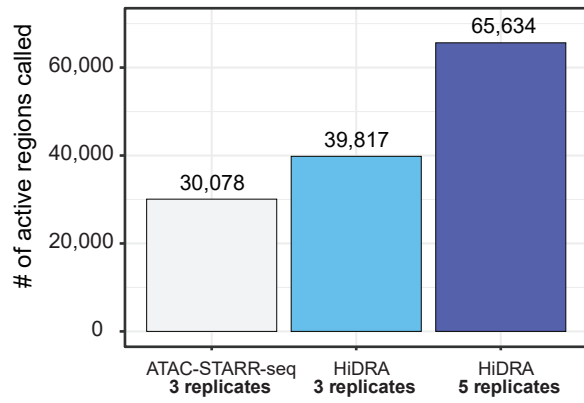**B**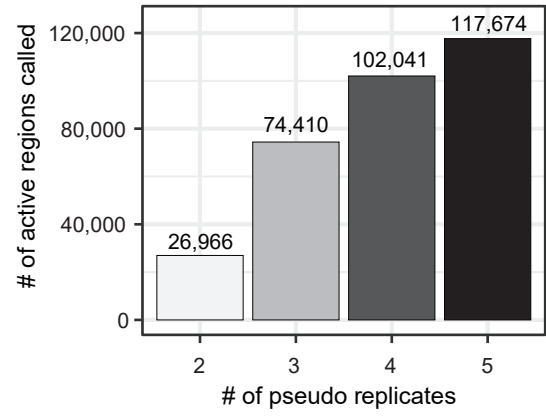

**Supplementary Figure 5. Analysis of replicate count on region calling sensitivity.** (A) Number of active regions called using HiDRA data with either 3 or 5 replicates. Current ATAC-STARR-seq active region number is plotted for comparison. (B) Number of active regions called when 2, 3, 4, or 5 pseudoreplicates are provided. To generate pseudoreplicates, replicates were merged and then split into 5 separate files.



Read duplicates removed

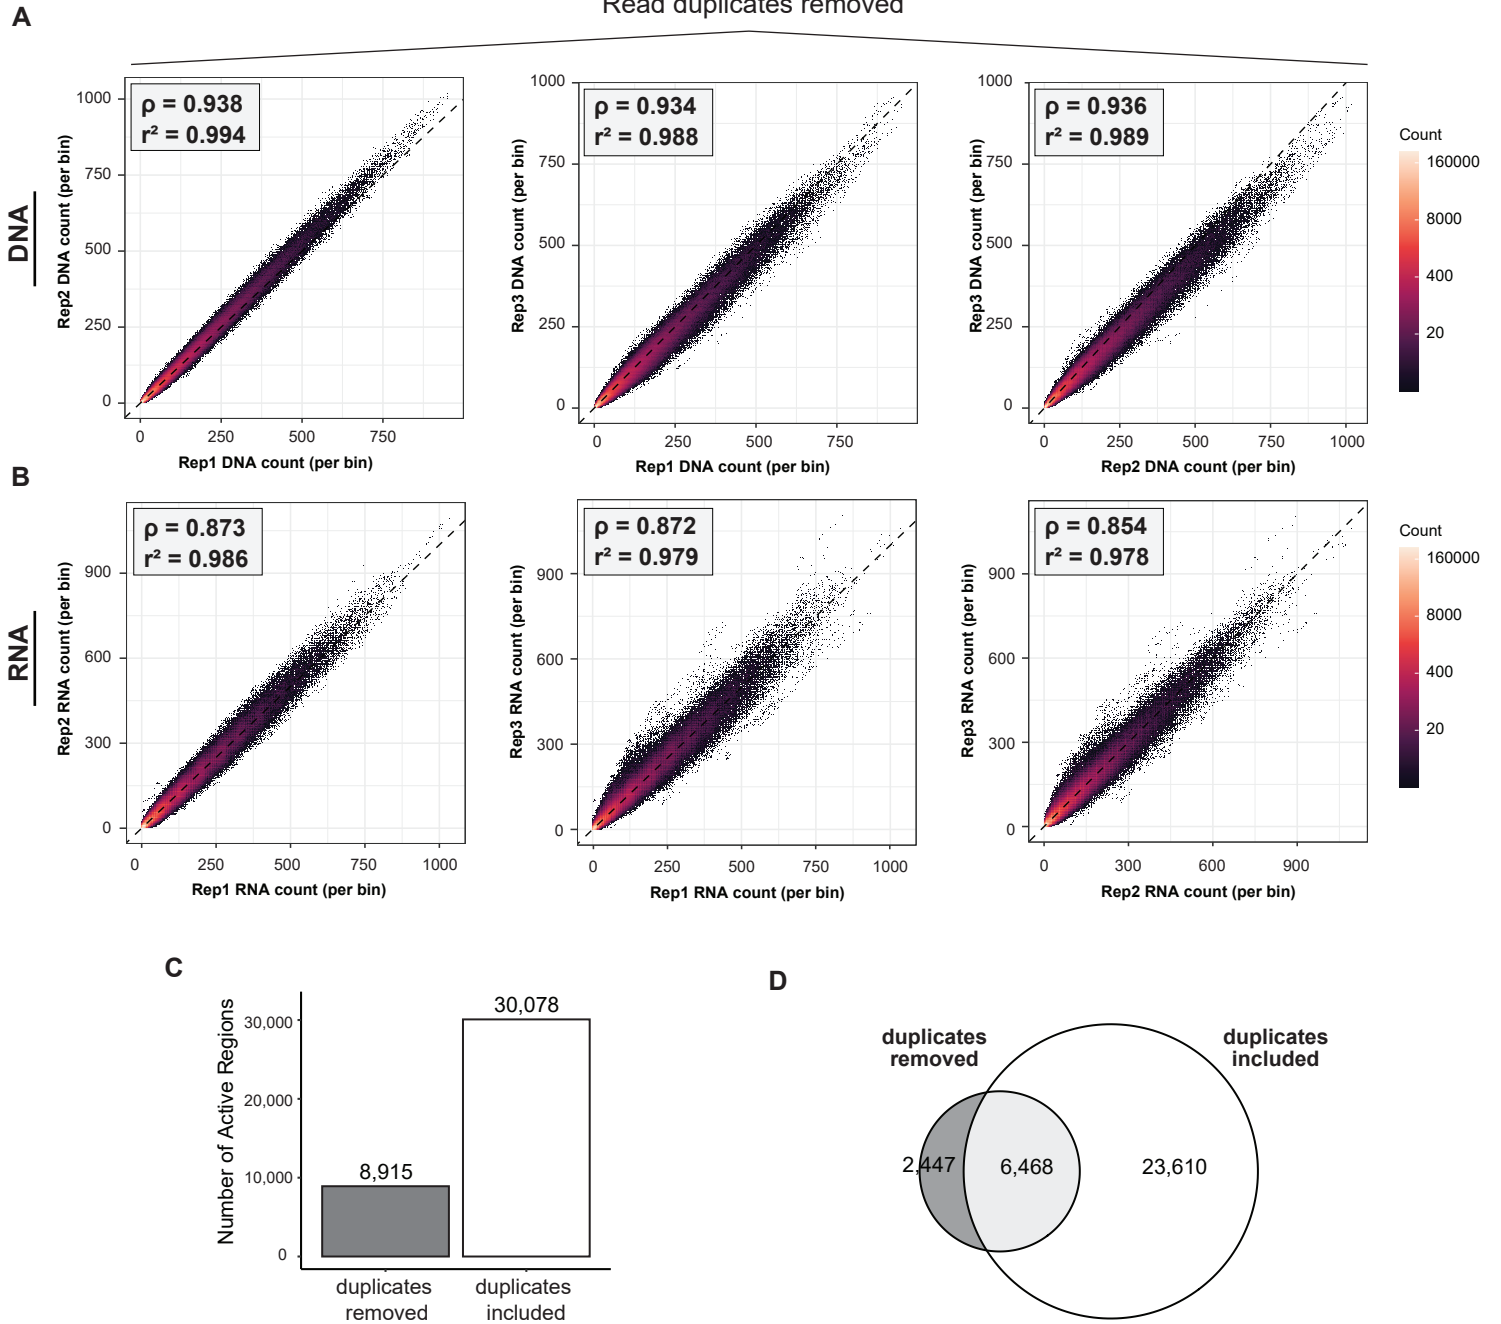

**Supplementary Figure 6. Comparison between keeping duplicates and removing duplicates to call active regions.** (A-B) Scatter plots of DESeq2-normalized read counts per bin between replicates for both (A) DNA and (B) RNA samples when duplicates are removed. Pearson ( $r^2$ ) and Spearman's ( $\rho$ ) correlation coefficients are indicated in the top left corner for each pairwise comparison. (C) The number of active regions called with or without duplicates. (D) Euler plot comparing the region overlap between the two methods.

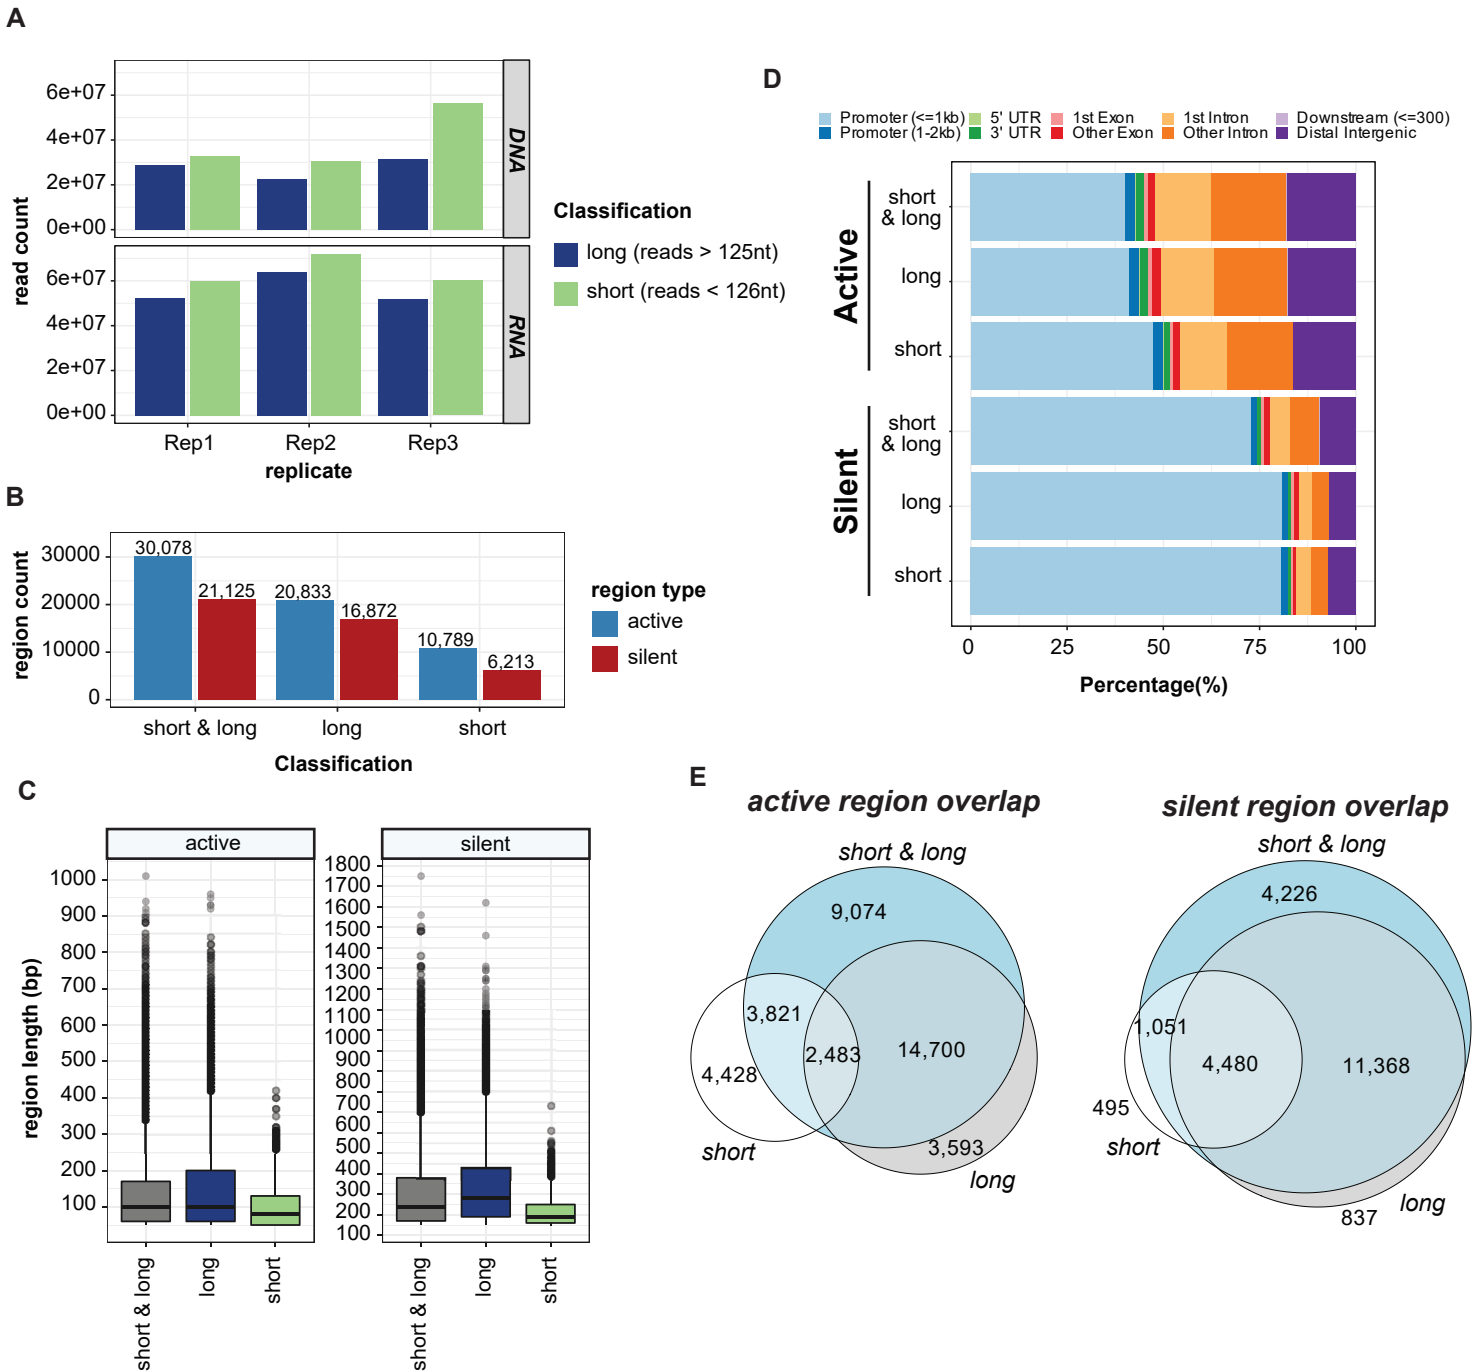

**Supplementary Figure 7. Effect of fragment length on regulatory region calls.** ATAC-STARR-seq fragments were parsed into “long” and “short” files based on whether they were greater than or less than or equal to 125nt. (A) read counts of each fragment length classification for each replicate for both plasmid DNA and reporter RNA samples. (B) Active and silent region counts using only long fragments, only short fragments, or both. (C) Boxplots of basepair (bp) length for the active and silent region sets called for each fragment length classification. (D) Annotation of regulatory regions relative to the transcriptional start site (TSS). The promoter is defined as 2kb upstream and 1 kb downstream of the TSS. (E) Venn diagrams representing the amount of active or silent region overlap between the region sets called from each fragment length classification.

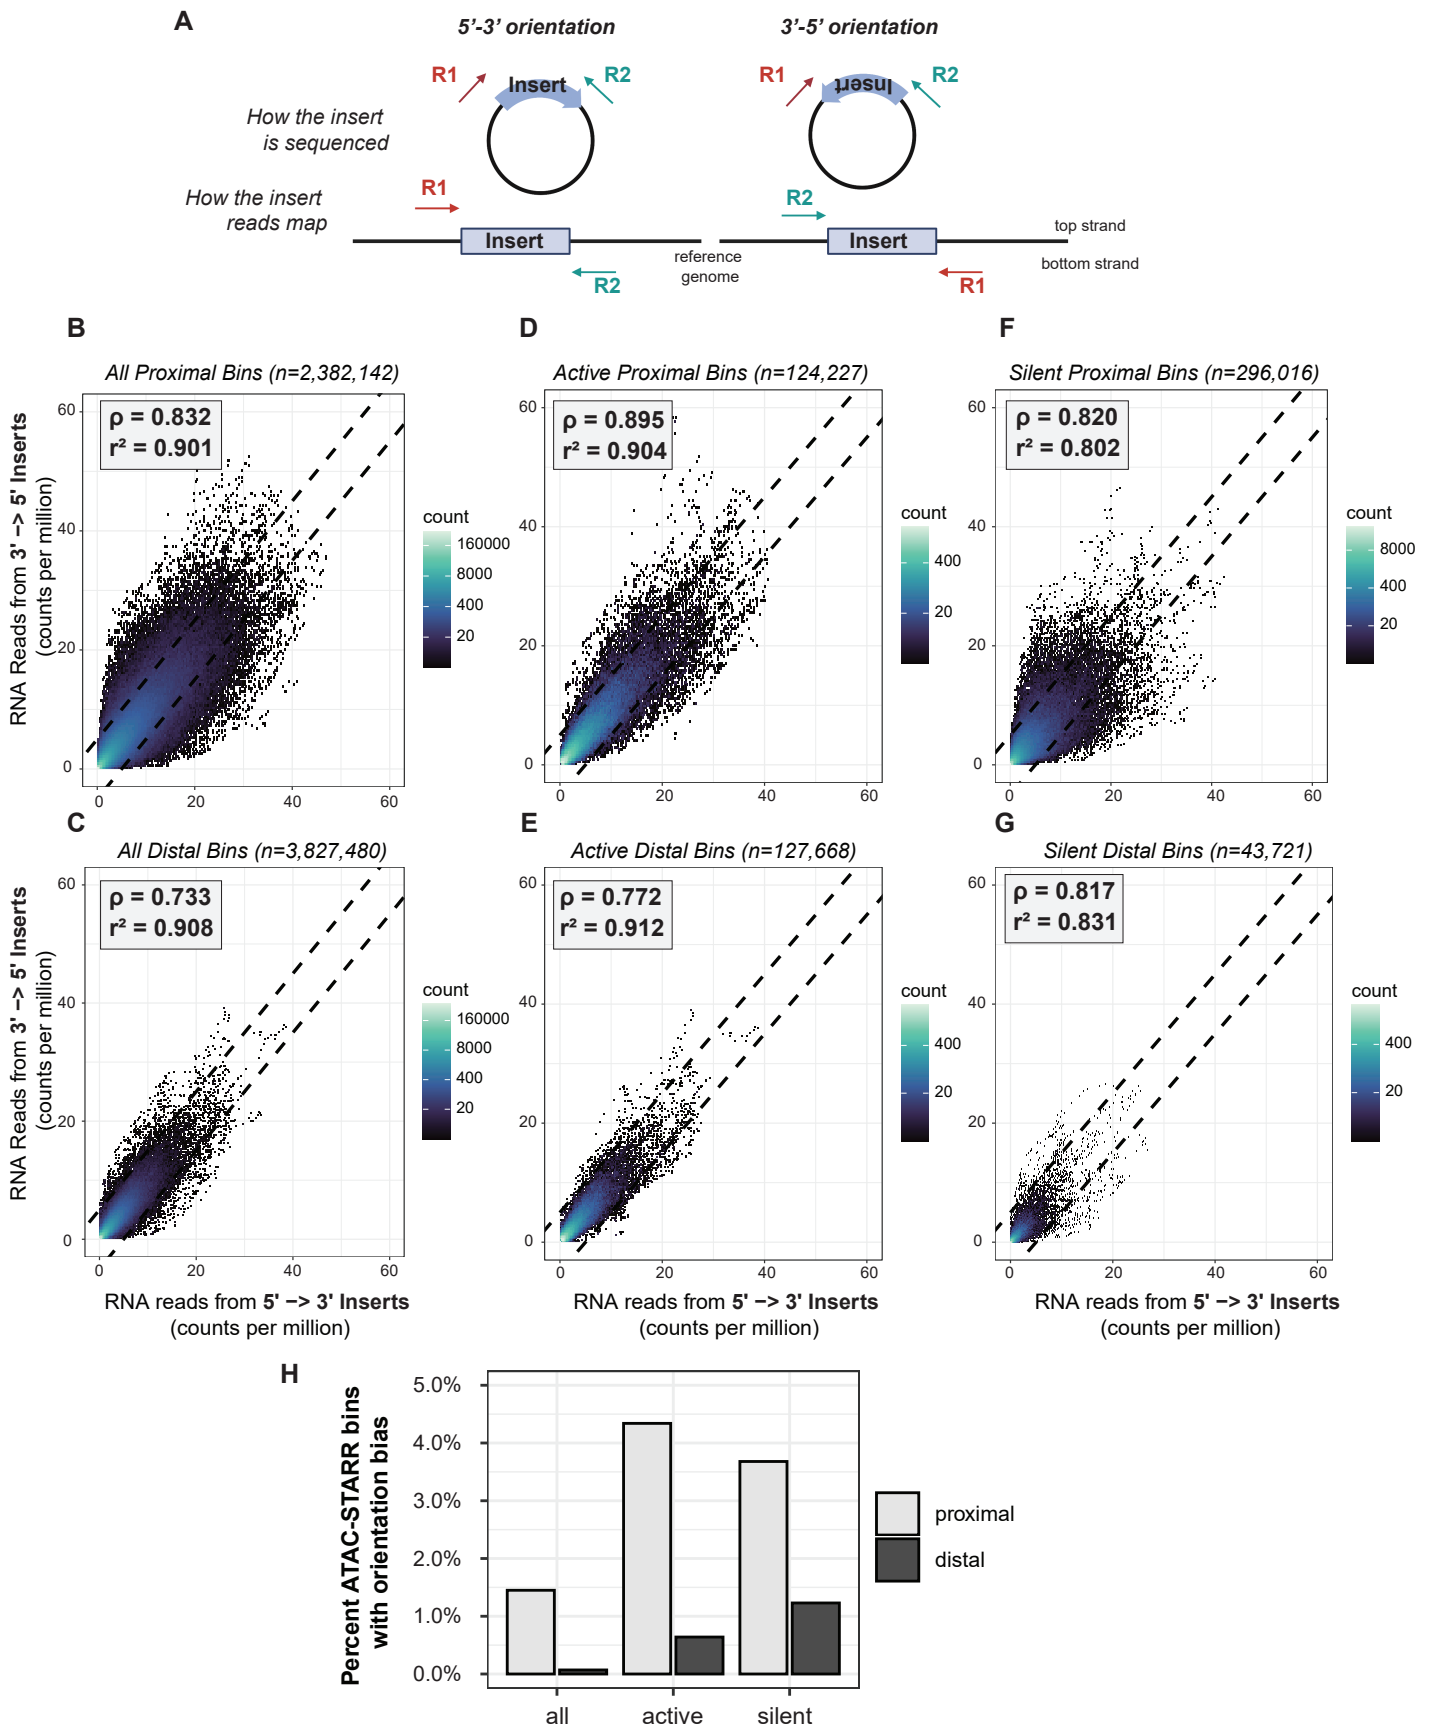

**Supplementary Figure 8. Assessment of potential orientation bias in ATAC-STARR-seq data.** (A) Schematic of the method for separating reads based on insert orientation. Read 1 and Read 2 are sequenced from the same position regardless of insert orientation on the plasmid and reporter RNA samples. Therefore, insert orientation can be specified based on how the read pair map to the genome. 5'-3' inserts have R1 on the top strand, while 3' -5' inserts have R1 on the bottom strand. (B-G) Scatter plots of counts per million normalized reporter RNA read counts between 5' to 3' inserts and 3' to 5' inserts for (B) all proximal bins analyzed, (C) all distal bins analyzed, (D) active proximal bins only, (E) active distal bins only, (F) silent proximal bins only or (G) silent distal bins only. Pearson ( $r^2$ ) and Spearman's ( $\rho$ ) correlation coefficients are indicated in the top left corner for each pairwise comparison. Proximal bins were defined as within 2kb upstream and 1kb downstream of a transcription start site, while distal bins was defined as everything else. Dashed lines indicate  $\pm 5$  counts from the expectation ( $y=x$ ). The percentage of bins that lie outside of these lines are denoted in (H).

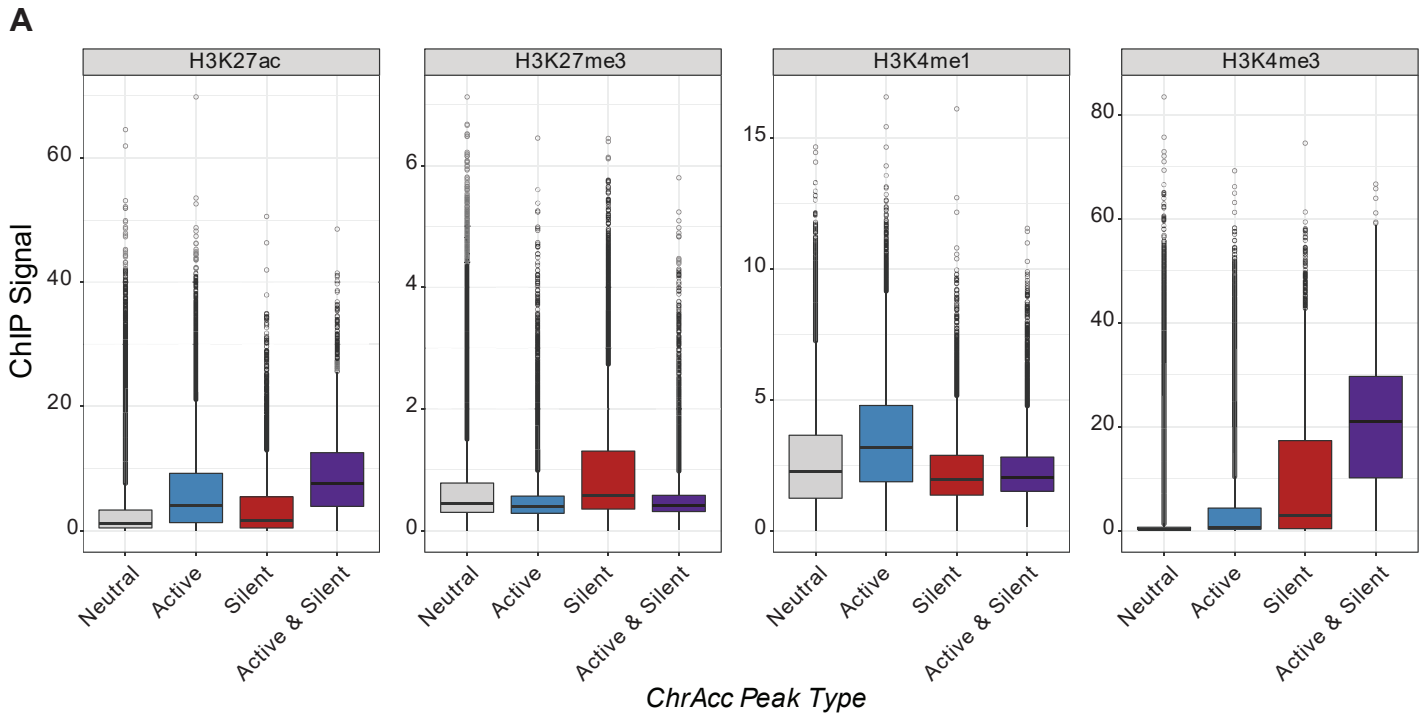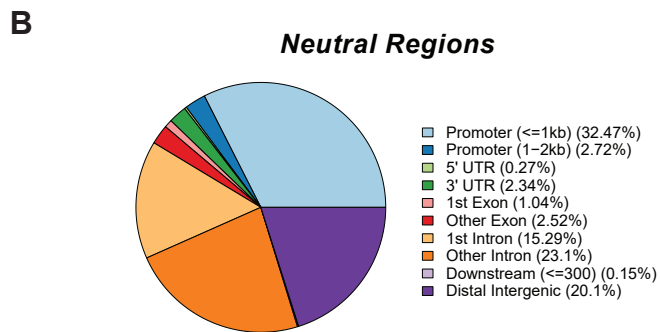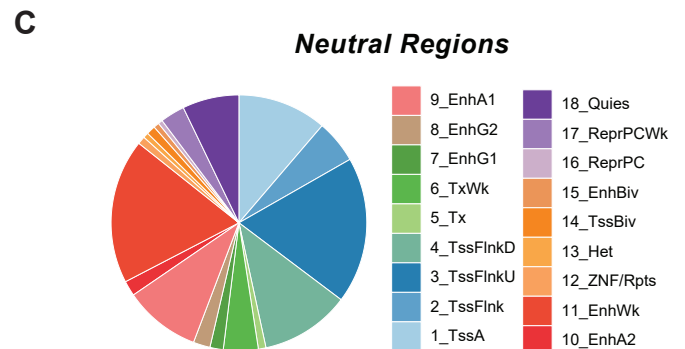

**Supplementary Figure 9. Additional Characterization of ATAC-STARR-seq Regulatory Regions.** (A) Histone modification ChIP-seq signal at accessible chromatin peaks. Boxplot of the distribution of histone modification ChIP-seq signal for accessible chromatin peaks (ChrAcc) that contain an active region, a silent region, both and active and silent region, or neither (neutral). Values represents the average *fold change over control* signal per region for each histone modification. (B) Annotation of regulatory regions relative to the transcriptional start site (TSS). The promoter is defined as 2kb upstream and 1 kb downstream of the TSS. (C) Annotation of regulatory regions by the ChromHMM 18-state model for GM12878 cells.
