# Supplementary material for: ATAC-STARR-seq reveals transcription factor–bound activators and silencers within chromatin-accessible regions of the human genome
Source: HighWire-hosted journal article supplement (doi:10.1101/gr.276766.122), 2022-07-20
Supplement: Supplemental_Table_S4.xlsx [file Supplemental_Table_S4.xlsx]

## Sheet: ATAC-STARR
Supplemental Table S4: Oligo sequences used in ATAC-STARR-seq and qPCR
Name	Sequence (5' to 3')	Description
Fwd_universal_STARR	CATCTCCGAGCCCACGAGACTCGACGAATTCGGCCGG	Primer to linearize vector with PCR and add homology arms for gibson cloning.
Rev_N504_STARR	ACATCTGACGCTGCCGACGATCTACTCTTGCATGCTCTAGATCAATCTAATTC	Primer to linearize vector with PCR, add a nextera i5 barcode to the linear vector, and add homology arms for gibson cloning.
Tn5_1	TCGTCGGCAGCGTCAGATGTGTATAAGAGACAG	Used to assemble Tn5 transposome. Nextera adapter A. Hybridize with TN5MEREV
Tn5_2_ME_comp	GTCTCGTGGGCTCGGAGATGTGTATAAGAGACAG	Used to assemble Tn5 transposome. Nextera adapter B. Hybridize with TN5MEREV
TN5MEREV	/5Phos/CTGTCTCTTATACACATCT	Used to assemble Tn5 transposome. Nextera adapter complementary sequence to Tn5_1 and Tn5_2_ME_comp
Fwd_atac-starr_tag	TCGTCGGCAGCGTCAGATG	used to extend and amplify tagments prior to cloning
Rev_atac-starr_tag	GTCTCGTGGGCTCGGAGATG	used to extend and amplify tagments prior to cloning
STARR_GSP	CTCATCAATGTATCTTATCATGTCTG	Gene Specific Primer used in Reverse Transcription (from Muerdter et al. 2018)
Nextera Index N701	CAAGCAGAAGACGGCATACGAGATTCGCCTTAGTCTCGTGGGCTCGG	i7 Barcode primer #1 for Nextera library preps (8bp barcode)
Nextera Index N702	CAAGCAGAAGACGGCATACGAGATCTAGTACGGTCTCGTGGGCTCGG	i7 Barcode primer #2 for Nextera library preps (8bp barcode)
Nextera Index N504	AATGATACGGCGACCACCGAGATCTACACAGAGTAGATCGTCGGCAGCGTC	i5 Barcode primer #4 for Nextera library preps (8bp barcode)
Nextera Index N505	AATGATACGGCGACCACCGAGATCTACACGTAAGGAGTCGTCGGCAGCGTC	i5 Barcode primer #5 for Nextera library preps (8bp barcode)
*Red denotes i7 or i5 barcode.
*/5Phos/ is IDT format for adding a phosphoryl group to the oligo

## Sheet: qPCR
Supplemental Table S4: Oligo sequences used in ATAC-STARR-seq and qPCR
Name	Sequence (5' to 3')
Fwd_qPCR_STARR-ORI-reporter-RNA	CACTGGGCAGGTGTCC
R_qPCR_hSTARR_ORI_reporter_RNA	GTCTCTTATACACATCTGACGC
GAPDH_fwd	AAATCAAGTGGGGCGATGCT
GAPDH_rev	CAAATGAGCCCCAGCCTTCT
ACTB_fwd	GTTGTCGACGACGAGCG
ACTB_rev	GCACAGAGCCTCGCCTT
IFIT2_fwd	AAGGGTGGACACGGTTAAAG
IFIT2_rev	GGTACTGGTTGTCAGGATTCAG
ISG15_fwd	AGCATCTTCACCGTCAGGTC
ISG15_rev	GCGAACTCATCTTTGCCAGT
IFNB1_fwd	GTTTCGGAGGTAACCTGTAAGT
IFNB1_rev	GAACCTCCTGGCTAATGTCTATC
